# Supplementary material for: Anti-dissolving Fe2N6 site-based carbon fiber membranes for binder-free Zn–air batteries with a 200-day lifespan
Source: Royal Society of Chemistry journal article supplement (doi:10.1039/d4ee03148b), 2024-01-01
Supplement: d4ee03148b1.pdf [file d4ee03148b1.pdf]

## **Supporting Information**

**Anti-dissolving Fe<sub>2</sub>N<sub>6</sub> Sites Based Carbon Fiber Membranes for Binder-free Zn-air Batteries with a 200-Day Lifespan**

*Zian Xu et. al.*

## 1. Experimental Section

### 1.1 Chemicals

1,4,5,8-naphthalene tetracarboxylic acid (NTCA, 98%, Zhengzhou Alfa Chemical Co.), poly(vinyl pyrrolidone) (PVP, Mw: 360,000, Meryer Chemical Co.), 1,3,5-tris(4-aminophenyl)benzene (TAPB), iron(III) acetylacetonate (99%, Shanghai Bodi Biotechnology Co., Ltd.) and N,N-dimethylformamide (DMF, 99.9%, Aladdin Bio-Chem Technology Co.) were used without further purification.

### 1.2 Synthesis of $Fe_2N_6$ -CMPCFs and other contrast samples

In a typical procedure, 0.456 g (1.5 mmol) NTCA, 0.351 g (1 mmol) TAPB and 90 mg PVP were mixed and dissolved in 2.7 mL DMF. The total concentration of the mixed solution was 25 wt.%. After stirring for 10 h at room temperature, 27 mg of the iron (III) acetylacetonate (3 wt.% content of the solid) was added, followed by stirring for 1 h to get the precursor solution for electrospinning.

During the electrospinning process, the applied voltage was controlled at 14 kV and the feed rate of the mixture solution was 0.7 mL h<sup>-1</sup>. A rotated roller covered with an aluminous foil with the distance of 20 cm to the needle was adopted as the collector. The obtained nanofiber membranes were heat-treated under Ar atmosphere with the following step-by-step procedure to promote the polycondensation of monomers: 1) heat treatment at 150 °C for 60 min; 2) increasing the temperature to 300 °C and annealing for another 60 min; 3) further heat treatment at 420 °C for 60 min for the complete reaction between the monomers and removal of the PVP to obtain the CMP fiber membranes. The reaction equation of the two monomers is shown in Figure S1. The carbonization of the CMP membrane was carried out at the temperature of 900 °C for 60 min. Later, the temperature of the furnace was decreased to 800 °C and started the importation of NH<sub>3</sub> for annealing for the last 30 min. The volume ratio of Ar and NH<sub>3</sub> was controlled on 5:1. The heat rates of the whole procedure were controlled at 5 °C min<sup>-1</sup>. The obtained carbon nanofiber membrane was named as  $Fe_2N_6$ -CMPCFs.

The samples were prepared using other iron (III) acetylacetonate contents of 1 wt.%

and 5 wt.% following the same procedure as Fe<sub>2</sub>N<sub>6</sub>-CMPCFs, which were named as FeN<sub>4</sub>-CMPCFs and Fe NPs-CMPCFs, respectively. The contrast samples without Fe dopant and without NH<sub>3</sub> were prepared and named as CMPCFs and Fe-CMPCFs-Ar, respectively. At last, the prepared carbon membranes were immersed into a 3.0 M H<sub>2</sub>SO<sub>4</sub> solution at 80 °C for 6 h. After rinsing, the samples were heated again at 900 °C for 1 h in the Ar atmosphere.

### *1.3 Sample Characterization*

Powder X-ray diffraction patterns were recorded on Rigaku D8, with a Cu K $\alpha$  radiation ( $\lambda=0.15406$  nm), to investigate the crystal structure. The morphology of as-prepared catalysts was observed with scanning electron microscopy (SEM, TESCAN MIRA3). Scanning transmission electron microscopy (STEM) (Scientific<sup>TM</sup> Talos F200X) and high angle annular dark-field scanning (HAADF-STEM) with a spherical aberration corrector (Titan Themis G2) were performed to detect the structure of as-prepared samples at the atomic level. The elemental distribution was obtained by the corresponding energy dispersive spectroscopy of HAADF-STEM. The surface composition for as-prepared samples were tested by X-ray photoelectron spectroscopy (XPS, Escalab Xi<sup>+</sup>) with monochromatic Al K $\alpha$  (1486.6 eV) radiation. Raman spectroscopy was adopted on HORIBA LabRAM HR Evolution, to reflect structural defect of catalysts, where the Ar<sup>+</sup> laser with 514 nm wavelength is used as the source of radiation. The specific surface areas were measured by isothermal N<sub>2</sub> adsorption/desorption isotherms (Micromeritics, ASAP2460-4, SIN 420) and the pore size distribution was analyzed by BJH and BET model. Fourier transform infrared spectra (FTIR, PerkinElmer) and solid-state <sup>13</sup>C nuclear magnetic resonance spectroscopy (NMR, Bruker AVANCE III HD 600WB) were adopted to verify the structure of polymerized CMP. Thermogravimetric analysis (TGA 55, TA Instruments, USA) was used to estimate the carbon yield of final products. X-ray absorption fine structure (XAFS) was detected at the 1W1B beam line of Beijing Synchrotron Radiation Facility (BSRF). The content of Fe element in all catalysts was characterized by ICP-OES analysis.

#### 1.4 Electrochemical Measurement

The electrochemical ORR tests were performed in O<sub>2</sub>-saturated 0.1 M KOH solution by a conventional three electrode system controlled by CHI 760 electrochemical workstation (Shanghai Chenhua Instrument Co., China). The rotating ring-disk electrode (RRDE, Pine Instrument Co, 0.236 cm<sup>2</sup>) was employed to load catalysts as a working electrode. And a carbon rod and Hg/HgO electrode were used as the counter and reference electrode, respectively. To prepare the working electrode, 5 mg catalyst was uniformly dispersed in 0.5 mL mixed solution (deionized water: ethanol: 5 wt. % Nafion solution = 19:19:2) with ultrasonication. Then, the catalyst ink was spread on the RRDE surface and dried naturally (loading amount: 0.6 mg cm<sup>-2</sup>). The commercial 20 wt.% Pt/C (J.M.) sample was used in the same loading content. Cyclic voltammetry (CV) measurements were performed in N<sub>2</sub> or O<sub>2</sub>-saturated 0.1 M KOH electrolyte with a scan rate of 50 mV s<sup>-1</sup> without rotating. Linear sweep voltammetry tests were carried out at 1600 rpm rotating speed with a scan rate of 5 mV s<sup>-1</sup> with automatic 95% iR compensation. The electron transfer number (n) and H<sub>2</sub>O<sub>2</sub> was calculated by the following equation:

$$n = 4 \times \frac{I_d}{I_d + I_r/N} \quad (1)$$

$$H_2O_2\% = 200 \times \frac{I_r/N}{I_d + I_r/N} \quad (2)$$

Where I<sub>d</sub> is the measured the disk current and I<sub>r</sub> represents the ring current; N is the ring collection efficiency of 0.37. The value of n during ORR was also calculated from the linear slopes of J<sup>-1</sup> versus ω<sup>-1/2</sup> plots based on the Koutecky-Levich (K-L) equation<sup>1</sup>:

$$\frac{1}{J} = \frac{1}{J_K} + \frac{1}{J_L} = \frac{1}{B\omega^{0.5}} + \frac{1}{J_K} \quad (1)$$

$$B = 0.2nFC_0D_0^{2/3}\nu^{-1/6} \quad (2)$$

$$J_K = nFkC_0 \quad (3)$$

Where  $J$  represents the measured current density ( $\text{mA cm}^{-2}$ );  $J_k$  is the kinetic current density ( $\text{mA cm}^{-2}$ );  $J_L$  is the limiting current density ( $\text{mA cm}^{-2}$ );  $\omega$  is the angular velocity (rpm);  $n$  is the electron transfer number per  $\text{O}_2$  molecule;  $F$  is the Faraday constant ( $F=96,485 \text{ C mol}^{-1}$ );  $D_0$  is the  $\text{O}_2$  diffusion coefficient in 0.1 M KOH ( $1.9 \times 10^{-5} \text{ cm}^2 \text{ s}^{-1}$ );  $\nu$  is the kinetic viscosity of 0.1 M KOH ( $0.01 \text{ cm}^2 \text{ s}^{-1}$ );  $C_0$  stands for the bulk concentration of  $\text{O}_2$  ( $1.2 \times 10^{-3} \text{ mol L}^{-1}$ ). EIS test was adopted in the frequency ranging from 100 kHz to 0.01 Hz with an amplitude of 5 mV. The accelerated durability test (ADT) to catalysts was conducted with 50 mV/s scan rate from potential 0.4 to 1.0 V vs. RHE. The chronoamperometric test ( $i-t$ ) was adopted at a constant potential 0.8 V vs. RHE to record the variation of current density. The anti-methanol test was carried out during the  $i-t$  process by injecting 10 mL methanol into the  $\text{O}_2$ -saturated 0.1 M KOH electrolyte. The double-layer capacitance ( $C_{dl}$ ) was evaluated by CV measurements from 20 to 100  $\text{mV s}^{-1}$  scan rates. TOF values were obtained via the following equation, where  $J$  is the measured current density,  $A$  accounts for the surface area of the electrode, 4 stands for the number of electrons transferred during  $\text{O}_2$  reduction,  $m$  is the mole number of active sites, and  $F$  represents the Faraday constant ( $F = 96,485 \text{ C mol}^{-1}$ ).

$$TOF = \frac{j \times A}{4 \times m \times F} \quad (1)$$

The electrochemical OER tests were performed in 1.0 M KOH solution with automatic 95% iR compensation and the  $i-t$  test was continued at the constant 10  $\text{mA cm}^{-2}$ .

### 1.5 Zn–Air Battery Assembly

Liquid-state ZABs were assembled with 6 M KOH and 0.2 M  $\text{Zn}(\text{CH}_3\text{COO})_2$  as the electrolyte, zinc plate as the anode, and  $\text{Fe}_2\text{N}_6$ -CMPCFs membrane (Loading: 1.5  $\text{mg cm}^{-2}$ -2  $\text{mg cm}^{-2}$ ) as the cathode. Besides, Ni foam and hydrophobic carbon paper were used as the current collector and gas diffusion layer, respectively. The discharge and charge polarization curves were conducted at a scan rate of 5  $\text{mV s}^{-1}$  on CHI-760E. The power density is obtained from the discharge polarization curve. The long-term stability tests were recorded with 20 min per cycle (10 min charge and 10 min discharge) on a Battery Testing System (NEWARE) at different temperatures ( $-10^\circ\text{C}$ ,  $25^\circ\text{C}$ ,  $50^\circ\text{C}$ ).

For flexible solid-state ZABs, KOH/sodium polyacrylate (KOH/PANa) hydrogel was prepared by the following process: 27 mL, 25 M sodium hydroxide solution was slowly added into acrylic acid solution (54 mL, 47 wt.%) under stirring in an ice bath for 12 h. Then, ammonium persulfate (0.78 g) was mixed into the above solution with ultrasonication for 0.5 h. After that, the polymerization process was proceeded at 40 °C for 30 h. Finally, the as-prepared PANa polymer was peeled off and fully dried and then soaked them into the 8M KOH and 0.2M Zn(CH<sub>3</sub>COO)<sub>2</sub> solution overnight to obtain the KOH/PANa hydrogel.

### *1.6 Computational methods*

This study employed the Vienna ab initio Simulation Package (VASP) code<sup>2, 3</sup> to conduct calculations based on density functional theory (DFT). The Perdew–Burke–Ernzerhof (PBE) functional<sup>4</sup> was utilized to describe the exchange-correlation energy within the generalized gradient approximation (GGA). The ionic cores were represented using projector augmented-wave (PAW) pseudo-potentials<sup>5</sup>, and a plane wave cutoff energy of 500 eV was applied. To simulate electrocatalytic reactions, an implicit solvation model was employed using VASPsol<sup>6</sup>, assuming a default relative permittivity of 78.4 F/m for water. Spin polarization was considered in all calculations. The electronic minimization process was done with a blocked Davidson iteration scheme. The self-consistent field (SCF) iteration converged with a threshold of 10<sup>-5</sup> eV, and a Gaussian smearing of 0.05 eV was applied. Geometric optimization utilized a convergence threshold of 0.02 eV·Å<sup>-1</sup> for maximum force. A  $\Gamma$ -centered scheme was used for sampling k-points in the first Brillouin zone, with 2×2×1 k-points. To account for strong correlation repulsion between d-electrons with opposite spin in transition metal atoms, the DFT+U method was implemented<sup>7</sup>, with an effective U value of 3.29 eV assigned to the Fe d-orbital<sup>8</sup>. The active site models were derived from modifying the p(7×6) graphene supercell model. A vacuum layer of 15 Å was incorporated in all models to mitigate the effects of periodic boundary conditions.

This study was built upon the overpotential theory established by Nørskov's research team<sup>9</sup>. Regarding the electrocatalytic oxygen reduction reaction (ORR) in solution, the

reaction pathway can be described as follows:

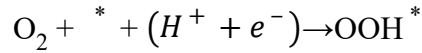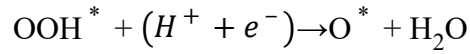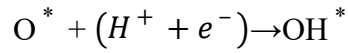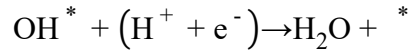

Adsorption free energy of various oxygen intermediates:

$$\Delta G_{\text{OOH}^*} = \Delta G(2\text{H}_2\text{O}(\text{l}) + * \rightarrow \text{OOH}^* + 3/2\text{H}_2(\text{g})) = \mu_{\text{OOH}^*} + 1.5\mu_{\text{H}_2} - 2\mu_{\text{H}_2\text{O}} - \mu_*$$

$$\Delta G_{\text{O}^*} = \Delta G(\text{H}_2\text{O}(\text{l}) + * \rightarrow \text{O}^* + \text{H}_2(\text{g})) = \mu_{\text{O}^*} + \mu_{\text{H}_2} - \mu_{\text{H}_2\text{O}} - \mu_*$$

$$\Delta G_{\text{OH}^*} = \Delta G(\text{H}_2\text{O}(\text{l}) + * \rightarrow \text{OH}^* + 1/2\text{H}_2(\text{g})) = \mu_{\text{OH}^*} + 0.5\mu_{\text{H}_2} - \mu_{\text{H}_2\text{O}} - \mu_*$$

Gibbs free energy change for each step of the ORR reaction:

$$\Delta G_1 = \Delta G_{\text{OOH}^*} - 4.916\text{eV}$$

$$\Delta G_2 = \Delta G_{\text{O}^*} - \Delta G_{\text{OOH}^*}$$

$$\Delta G_3 = \Delta G_{\text{OH}^*} - \Delta G_{\text{O}^*}$$

$$\Delta G_4 = -\Delta G_{\text{OH}^*}$$

Thermodynamic onset and over potential of ORR:

$$U_{\text{ORR}}^{\text{onset}} = -\max\{\Delta G_1, \Delta G_2, \Delta G_3, \Delta G_4\}/e$$

$$U_{\text{ORR}}^{\text{over}} = 1.229\text{ V} - U_{\text{onset}}$$

For Fe<sub>2</sub>N<sub>6</sub>-based diatomic catalysts, due to the synergistic effect, OOH\* exists in the form of OH-O\*, while O\* exists in the form of OH-OH\*<sup>10</sup>.

In the field of single-atom and diatomic electrocatalysis, in addition to having good thermodynamic intrinsic activity, the stability of the electrocatalyst is also crucial. The limited solubility of central metal ions is a necessary guarantee for maintaining the stability of catalysts.

To calculate the free energy of dissolution of the central metal ion, we design the following thermodynamic process:

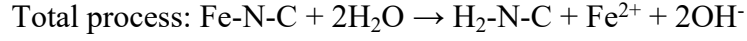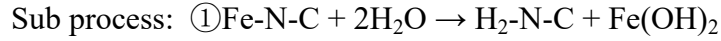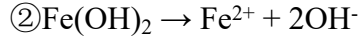

The free energy of process 1 was calculated by VASP based on density functional theory.  $\text{H}_2\text{O}$  and  $\text{Fe(OH)}_2$  are considered as crystals. The free energy of process 2 could be obtained by using the thermodynamic formula “ $\Delta G = -RT \ln K$ ”, based on the conversion of the solubility product constant of  $\text{Fe(OH)}_2$  ( $\text{pK}_{\text{sp}}(\text{Fe(OH)}_2) = 16.31$ )

The summation of the free energies of the two processes gives the free energy of the overall reaction, and higher stability of the central metal ion in the canonical center, the more positive free energy of the overall reaction.

Thermal corrections for adsorbed species, small molecules and post-processing of electronic structure analysis were based on VASPKIT<sup>11</sup>.

The d-band centers ( $\varepsilon_d$ ) were calculated from the density of states (DOS,  $n_d(\varepsilon)$ ) using the following formula:

$$\varepsilon_d = \frac{\int_{-\infty}^{\infty} n_d(\varepsilon) \varepsilon d\varepsilon}{\int_{-\infty}^{\infty} n_d(\varepsilon) d\varepsilon}$$

The computation of crystal orbital Hamilton population<sup>12, 13</sup> (COHP) and partial charges, along with the projection of COHP onto each orbital, was performed by utilizing LOBSTER<sup>14, 15</sup>.

-ICOHP represents the negative value of the integration of COHP from negative infinity to the Fermi energy:

$$-ICOHP = - \int_{-\infty}^{E_f} COHP(\varepsilon) d\varepsilon$$



## 2. Supplementary figures

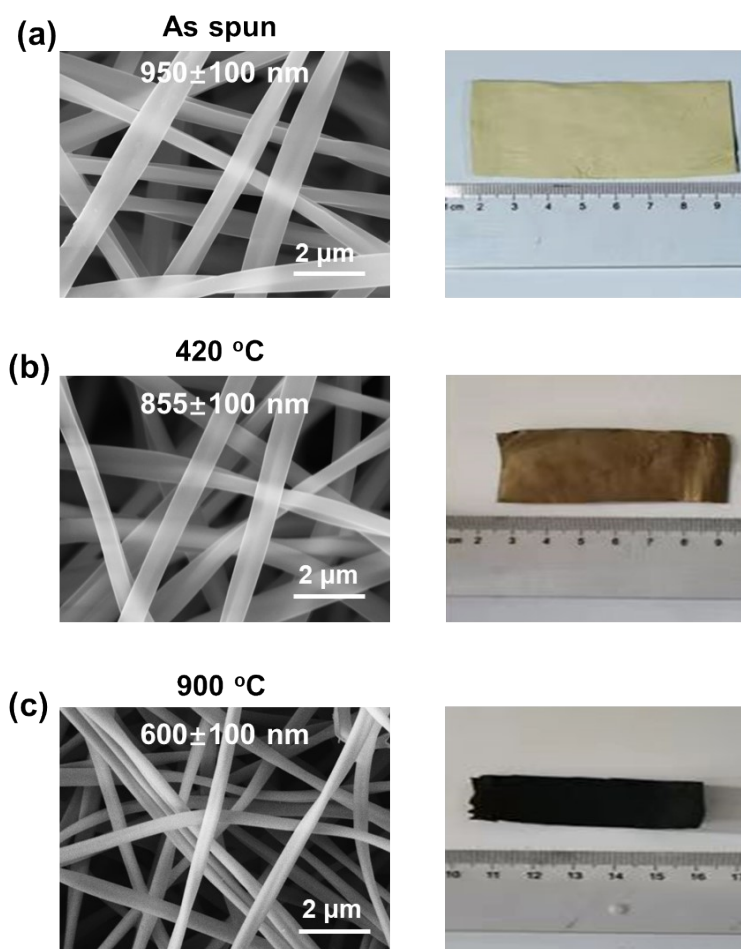

**Figure S1.** SEM images of a) as-spun fibers, b) fibers after heat treatment at  $420$  °C, and their corresponding digital pictures.

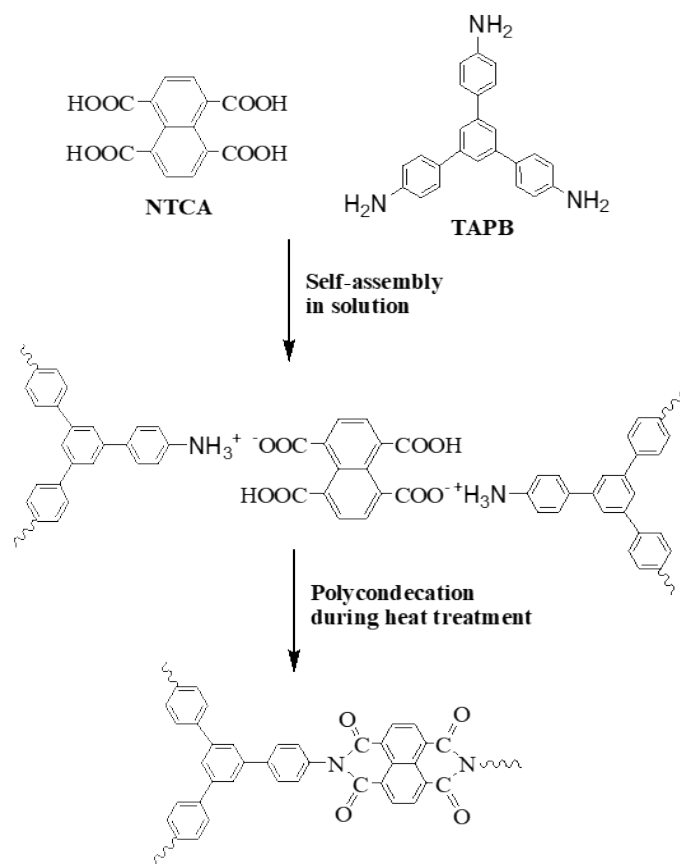

**Figure S2.** Chemical reaction equation of TAPB and NTCA.

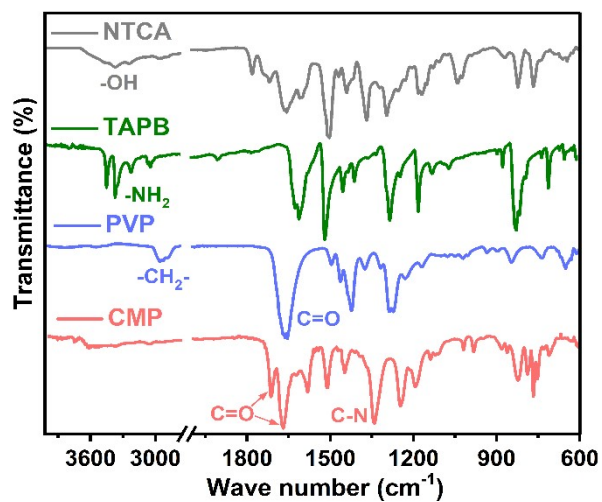

**Figure S3.** FTIR spectra of NTCA, TAPB, PVP, and CMP.

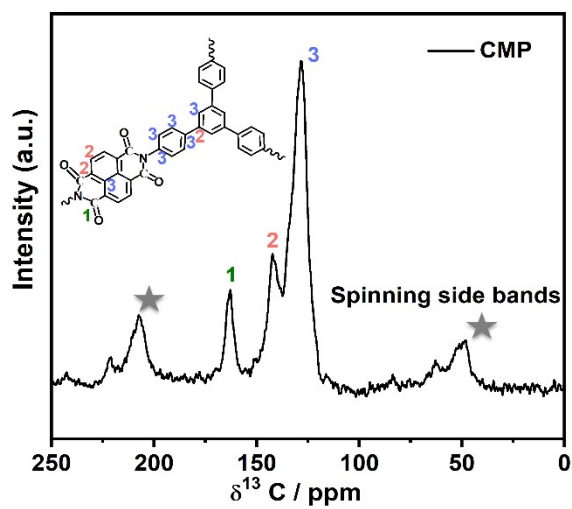

**Figure S4.**  $^{13}\text{C}$  NMR spectra spectrum of CMP.

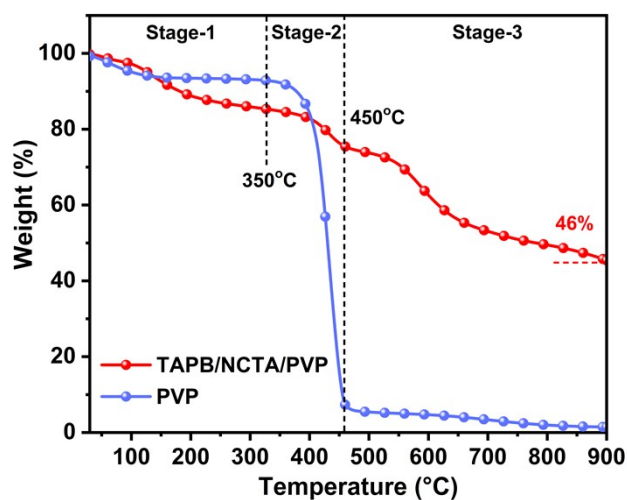

**Figure S5.** TGA curves of TAPB/NTCA/PVP and PVP.

**Note:** The weight loss of 15 wt.% in the first stage (25 to 350 °C) can be attributed to the loss of H<sub>2</sub>O, generating from the polycondensation of NTCA and TAPT. In addition, in the second stage (350 to 450 °C), the weight loss of 9 wt.% can also be observed which is derived from the PVP decomposition. When further heating to 900 °C, the TGA analysis exhibits a high carbon yield of 46% for our well-designed membrane.

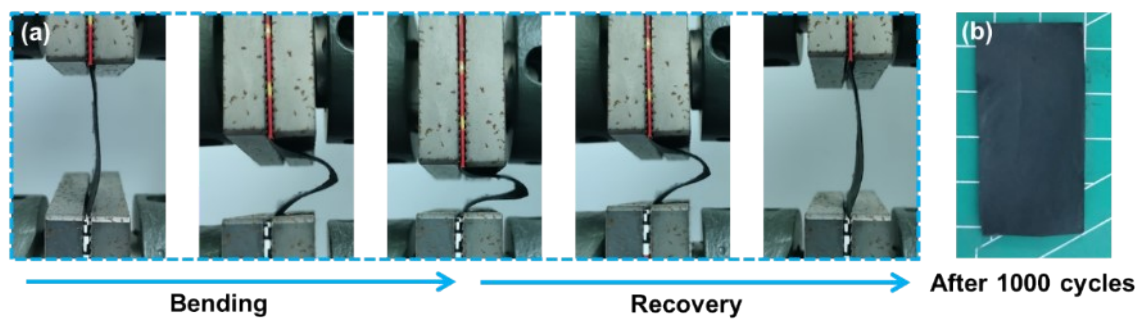

**Figure S6.** Bend testing for our as-prepared membrane.

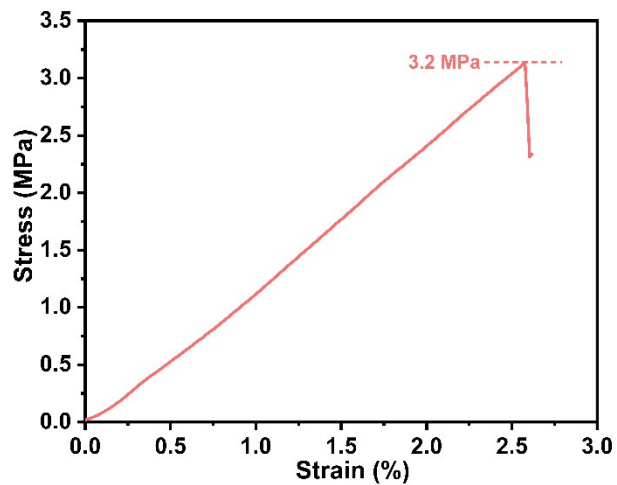

**Figure S7.** Tensile testing for our as-prepared membrane.

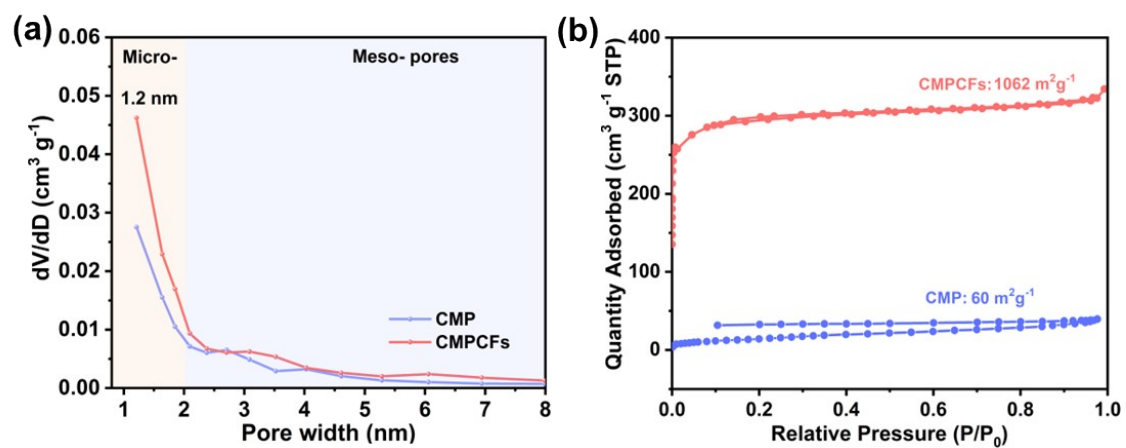

**Figure S8.** a) Pore size distribution of CMP and CMPCFs. b) Nitrogen adsorption-desorption isotherms of CMPCFs and CMP.

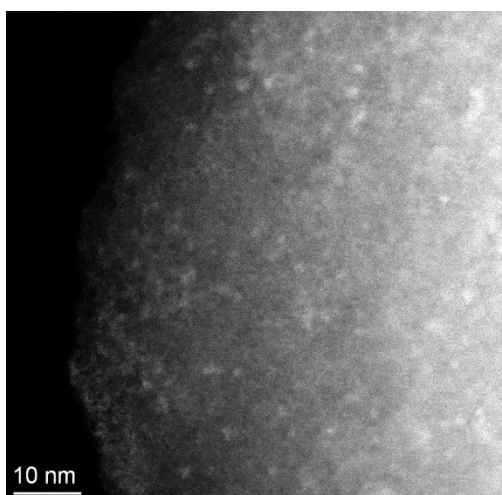

**Figure S9.** Aberration-corrected HAADF-STEM images of our sample after the first-step pyrolysis

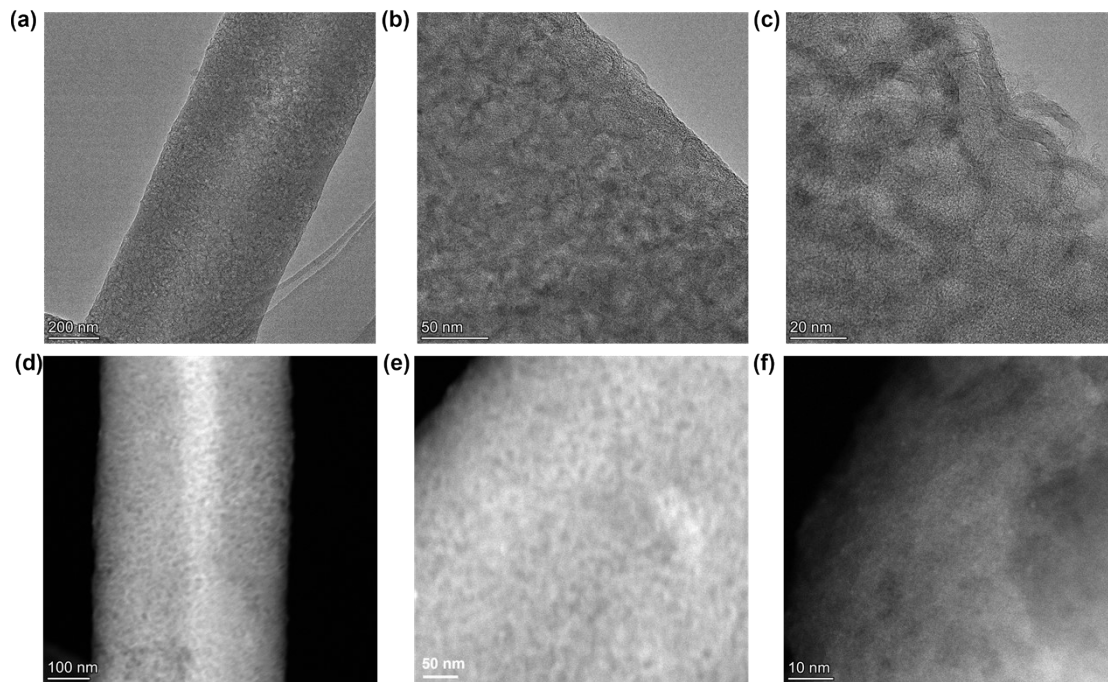

**Figure S10.** (a-c) TEM and (d-f) HAADF-STEM images of resultant Fe<sub>2</sub>N<sub>6</sub>-CMPCFs.

**Note:** TEM and HAADF-STEM images in different scales demonstrate that the Fe clusters is absent after the two-step NH<sub>3</sub>-assisted pyrolysis.

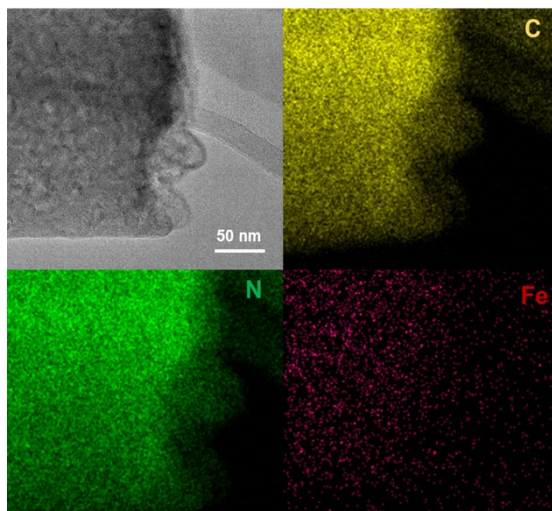

**Figure S11.** The energy-dispersive X-ray spectroscopy (EDS) images of Fe<sub>2</sub>N<sub>6</sub>-CMPCFs.

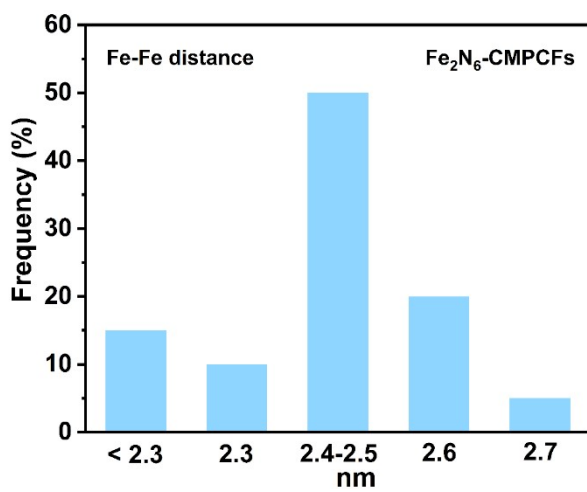

**Figure S12.** Statistical distribution of dual Fe-Fe distance in Fe<sub>2</sub>N<sub>6</sub>-CMPCFs.



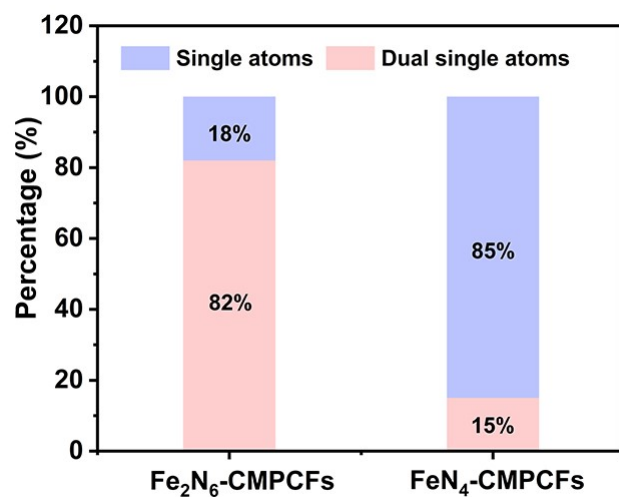

**Figure S13.** Statistical distribution of single-atomic and dual-single-atomic sites in FeN<sub>4</sub>-CMPCFs and Fe<sub>2</sub>N<sub>6</sub>-CMPCFs.

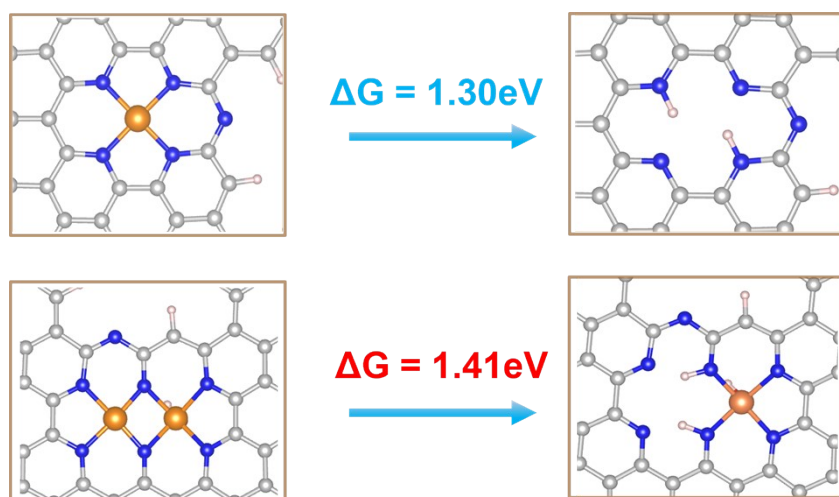

**Figure S14.** The diagram of the Fe atom dissolving from the carbon host into the solvent for FeN<sub>4</sub> and Fe<sub>2</sub>N<sub>6</sub> structure. The orange, blue, gray, and pink balls represent the Fe, N, C, and H atoms respectively.

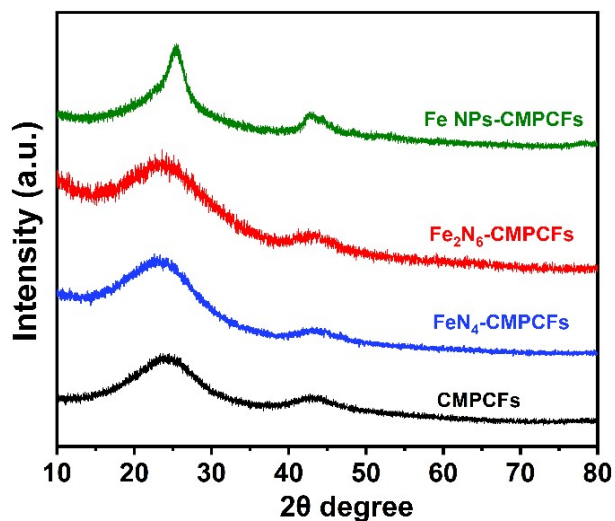

**Figure S15.** XRD patterns of FeN<sub>4</sub>-CMPCFs, Fe<sub>2</sub>N<sub>6</sub>-CMPCFs, Fe NPs-CMPCFs, and CMPCFs.

**Note:** XRD did not detect any crystalline Fe species in FeN<sub>4</sub>-CMPCFs and Fe<sub>2</sub>N<sub>6</sub>-CMPCFs. While, for Fe NPs-CMPCFs sample, a tiny peak at 44° corresponds to the (110) facet of metallic iron, illustrating the existence of Fe aggregation.

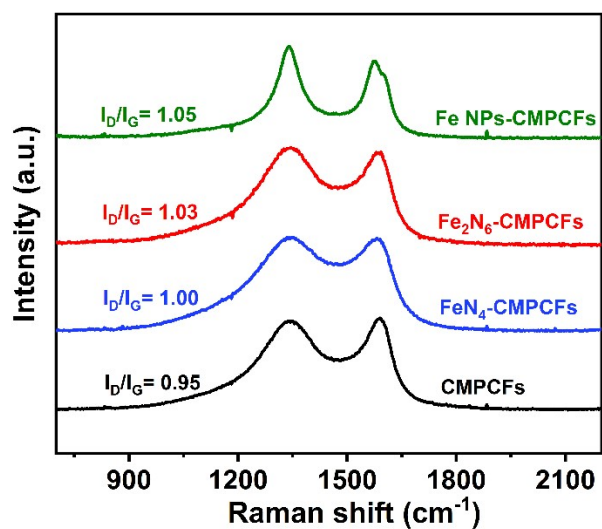

**Figure S16.** Raman spectra of FeN<sub>4</sub>-CMPCFs, Fe<sub>2</sub>N<sub>6</sub>-CMPCFs, and Fe NPs-CMPCFs, CMPCFs.

**Note:** With increasing the Fe dopant, the degree of carbon defect gradually increased.

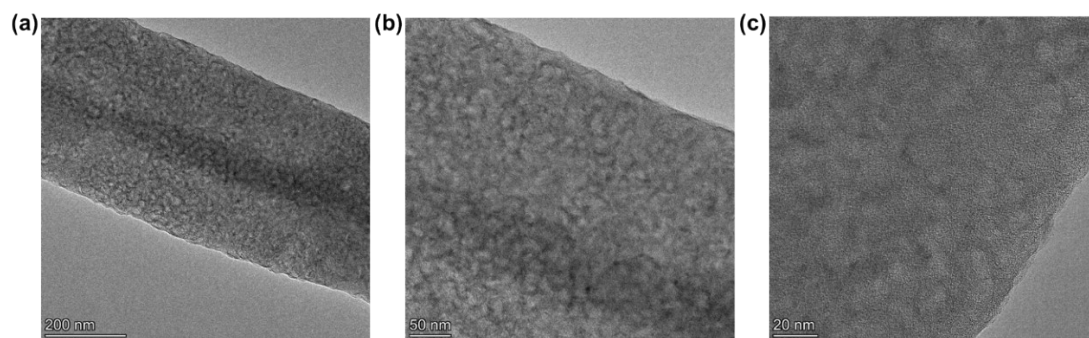

**Figure S17.** TEM images of FeN<sub>4</sub>-CMPCFs.

**Note:** TEM cannot detect any Fe aggregation of FeN<sub>4</sub>-CMPCFs sample.

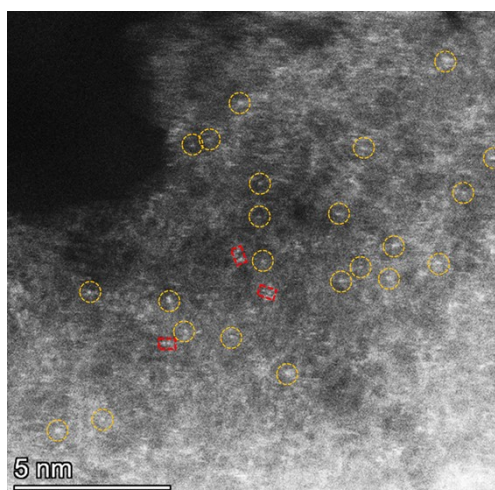

**Figure S18.** The AC-HAADF-STEM image of FeN<sub>4</sub>-CMPCFs.

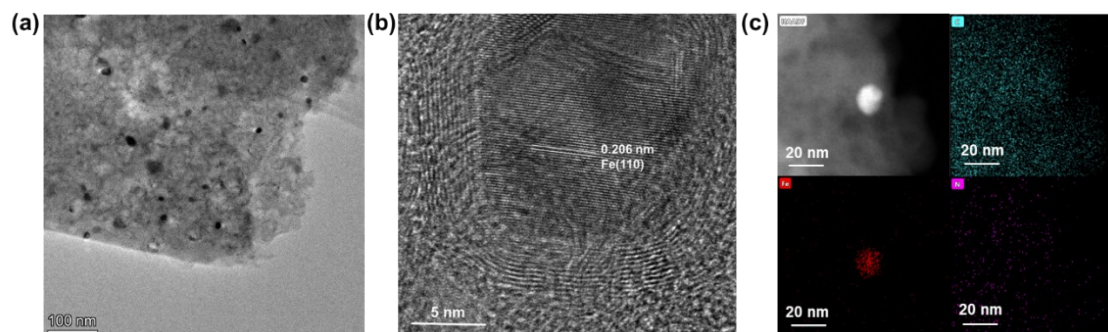

**Figure S19.** a-b) TEM images of Fe NPs-CMPCFs. c) HAADF-STEM image and its corresponding EDS mappings.

**Note:** Obvious metal nanoparticles can be seen in Fe NPs-CMPCFs. According to its lattice spacing and EDS mapping, we conclude that its metal aggregation belongs to the Fe nanoparticles. Meanwhile, we can also observe the graphitic carbon layer in Figure S18b, which is consistent with the XRD result in Figure S14.

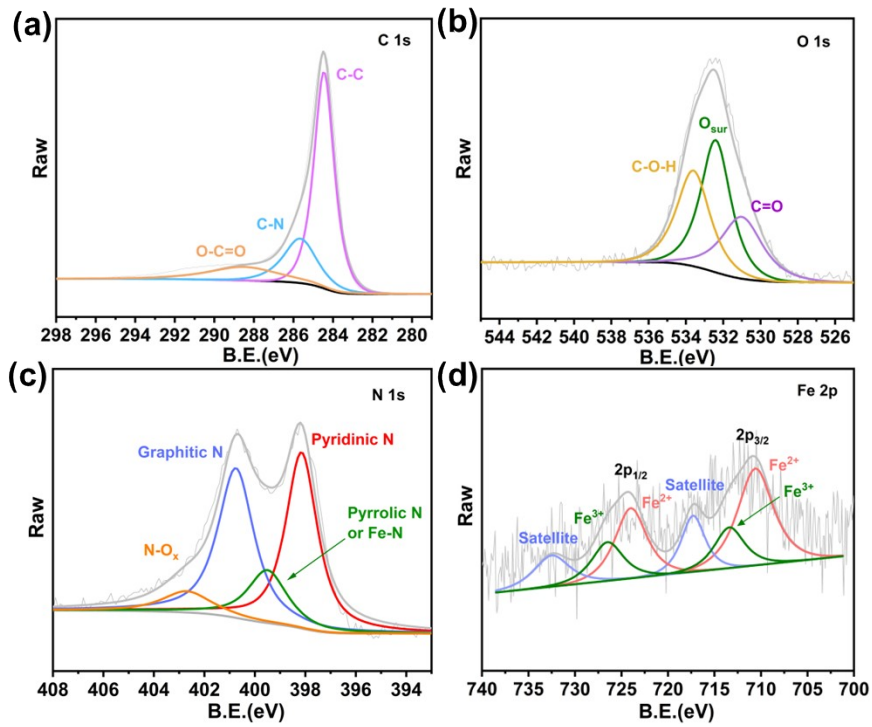

**Figure S20.** High-resolution XPS spectra of C 1s, O 1s, N 1s and Fe 2p for FeN<sub>4</sub>-CMPCFs.

**Note:** Compared with Fe-CMPCFs-Ar, the ratio of pyridinic-N increases sharply in FeN<sub>4</sub>-CMPCFs.

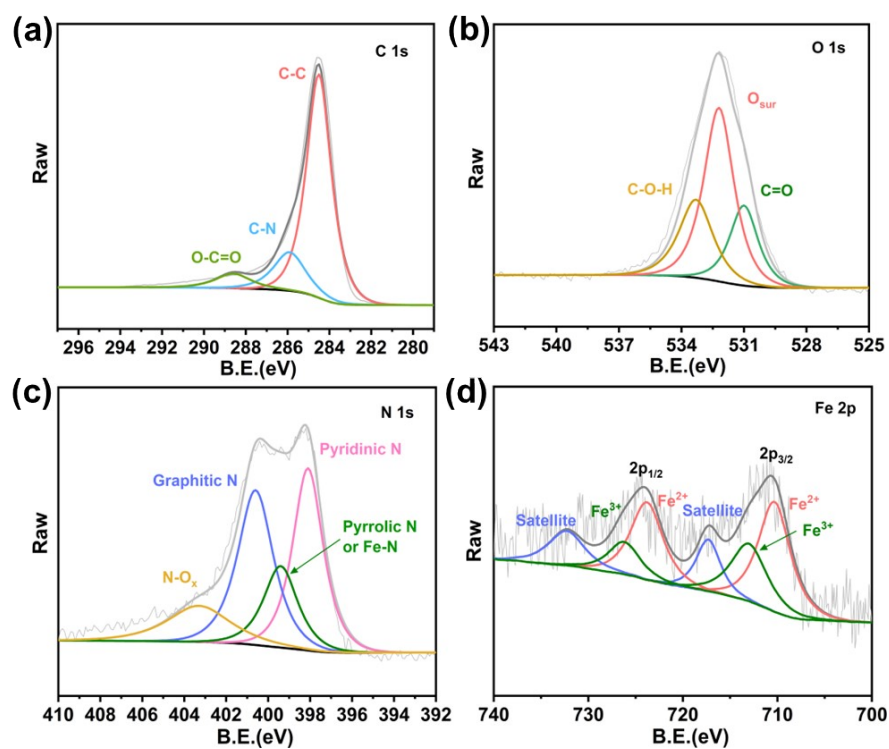

**Figure S21.** High-resolution XPS spectra of C 1s, O 1s, N 1s and Fe 2p for Fe<sub>2</sub>N<sub>6</sub>-CMPCFs.

**Note:** The percentage of pyrrolic-N or Fe-N obviously rises in Fe<sub>2</sub>N<sub>6</sub>-CMPCFs.

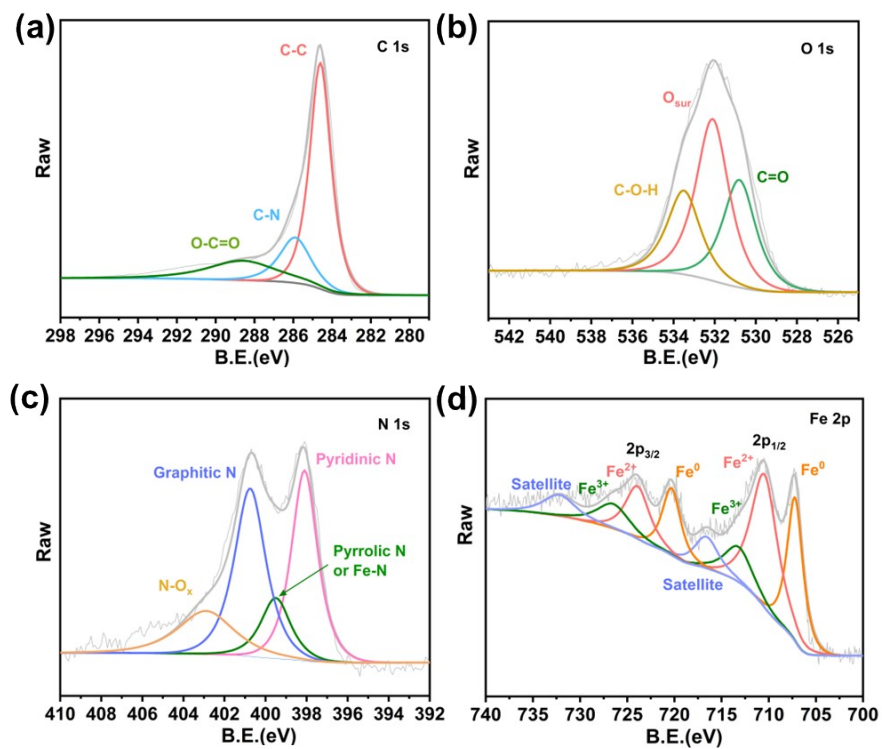

**Figure S22.** High-resolution XPS spectra of C 1s, O 1s, N 1s and Fe 2p for Fe NPs-CMPCFs.

**Note:** For Fe NPs-CMPCFs, a distinct peak at around 706 eV in Fe 2p spectrum represents the existence of Fe nanoparticles.



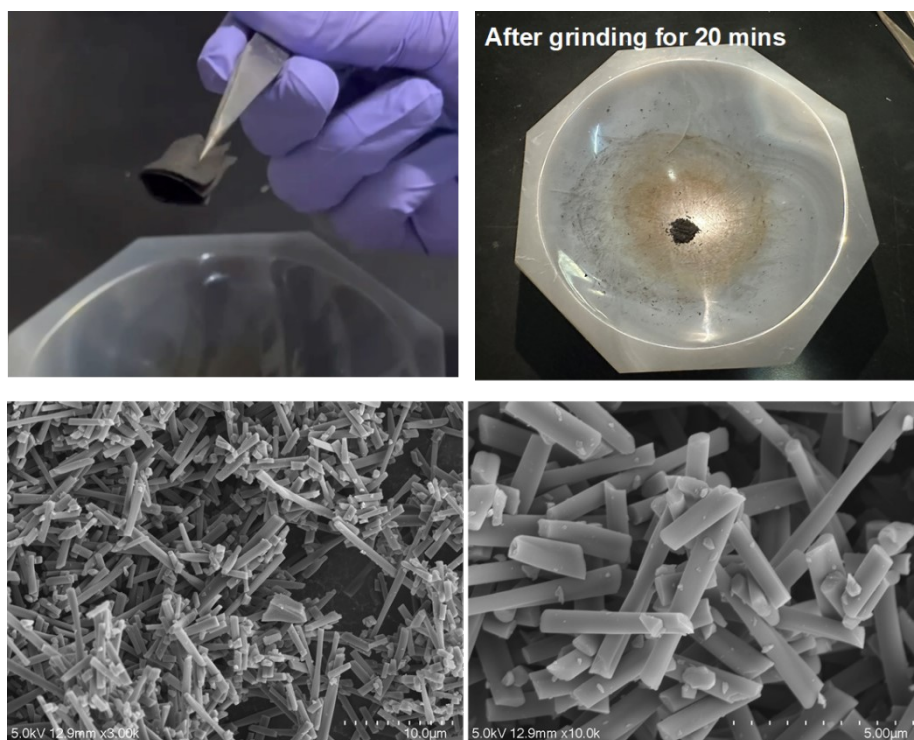

**Figure S23.** The digital pictures and SEM images of the wrecked membrane for electrochemical tests.

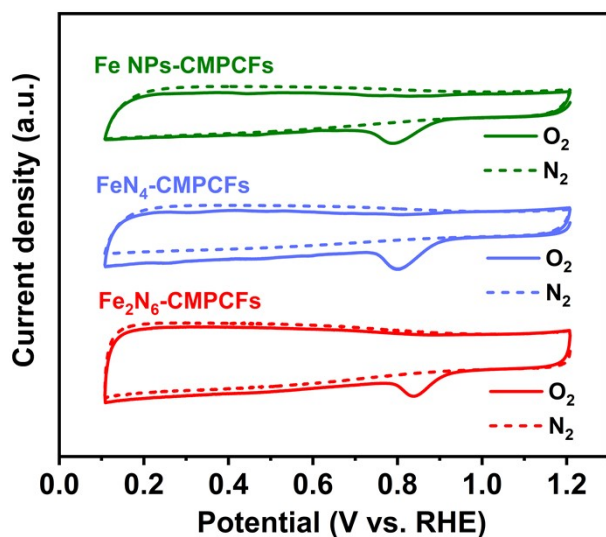

**Figure S24.** CV curves of Fe<sub>2</sub>N<sub>6</sub>-CMPCFs, FeN<sub>4</sub>-CMPCFs, Fe NPs-CMPCFs in N<sub>2</sub>- and O<sub>2</sub>-saturated 0.1 M KOH at a scan rate of 50 mV/s with 0 rpm.

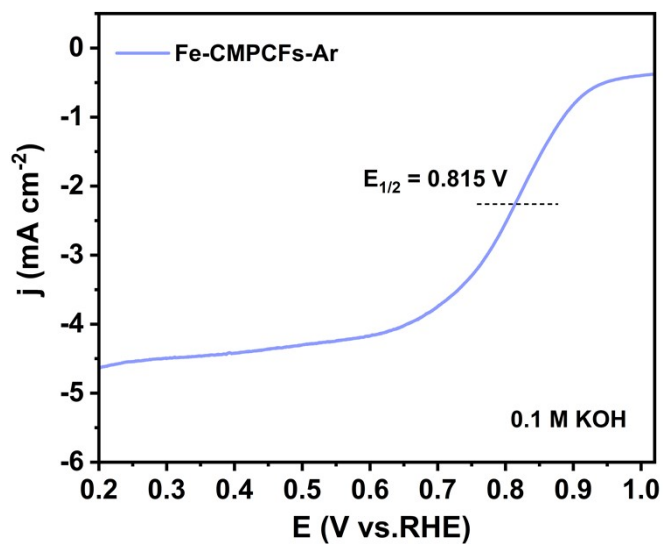

**Figure S25.** The LSV curve for the sample after first-step pyrolysis.

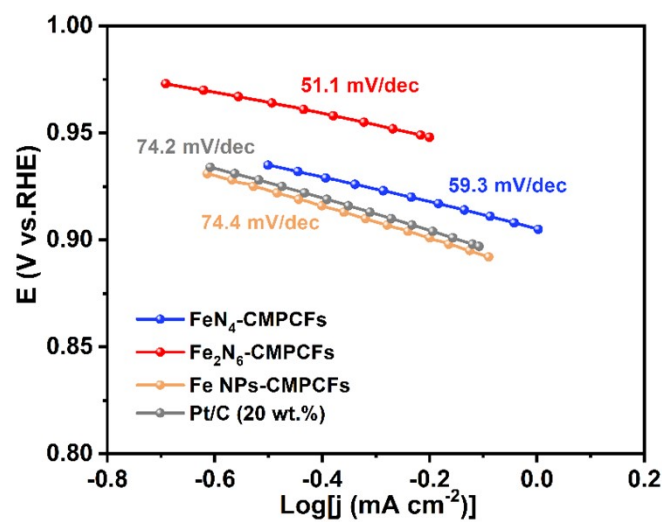

**Figure S26.** Tafel slope of  $\text{FeN}_4\text{-CMPCFs}$ ,  $\text{Fe}_2\text{N}_6\text{-CMPCFs}$ ,  $\text{Fe NPs-CMPCFs}$  and  $\text{Pt/C}$ .

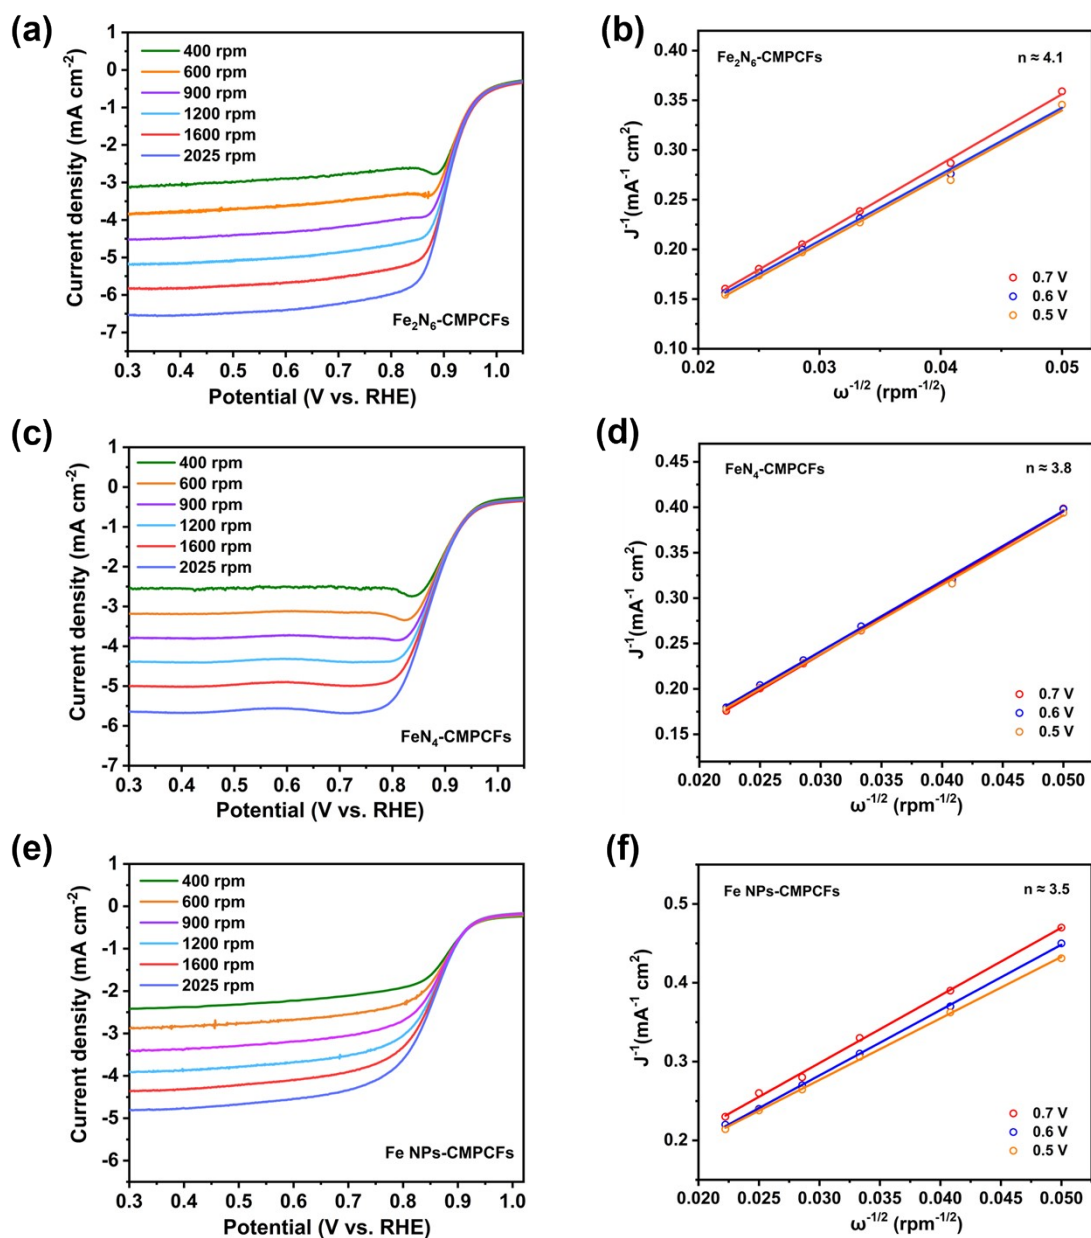

**Figure S27.** ORR linear sweeps with various rotating rates and K–L plots at different potentials in O<sub>2</sub>-saturated 0.1 M KOH for (a-b) Fe<sub>2</sub>N<sub>6</sub>-CMPCFs, (c-d) FeN<sub>4</sub>-CMPCFs, (e-f) Fe NPs-CMPCFs.

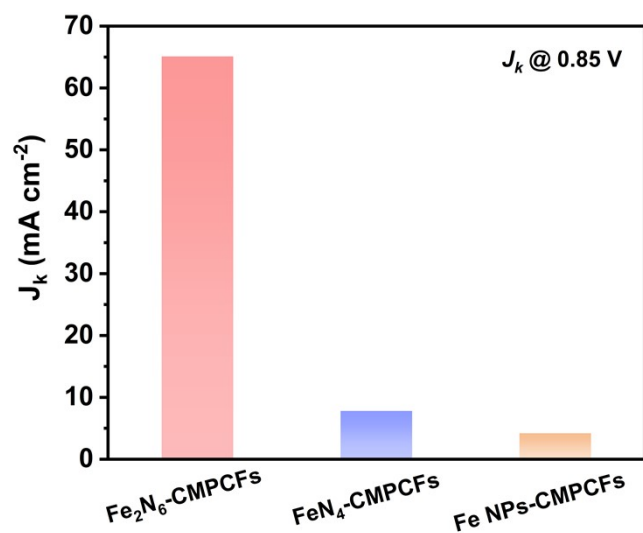

**Figure S28.** Kinetic current density ( $J_k$ ) at 0.85 V for different catalysts.

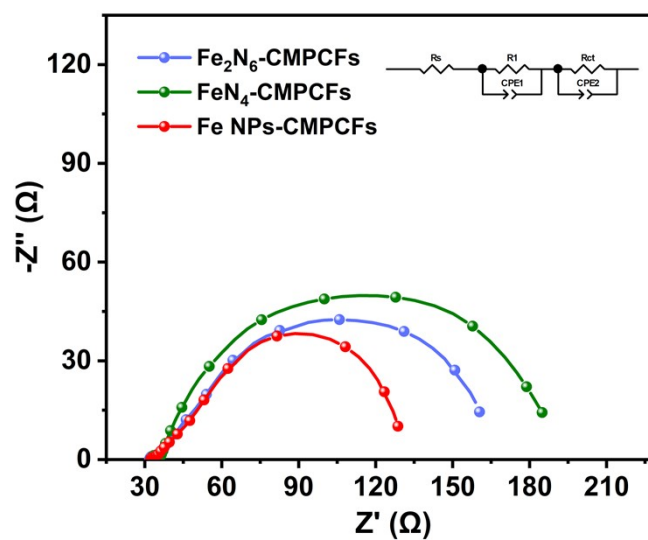

**Figure S29.** Electrochemical impedance spectra (EIS) of Fe<sub>2</sub>N<sub>6</sub>-CMPCFs, FeN<sub>4</sub>-CMPCFs, and Fe NPs-CMPCFs catalysts with a rotation speed of 1600 rpm at the potential of 0.86 V vs RHE. (The insert is the equivalent circuit model).

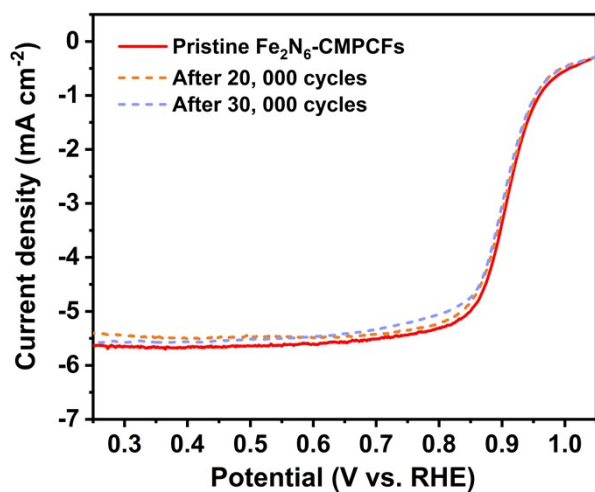

**Figure S30.** The LSV curves of  $\text{Fe}_2\text{N}_6\text{-CMPCFs}$  after 20, 000 and 30, 000 cycles.

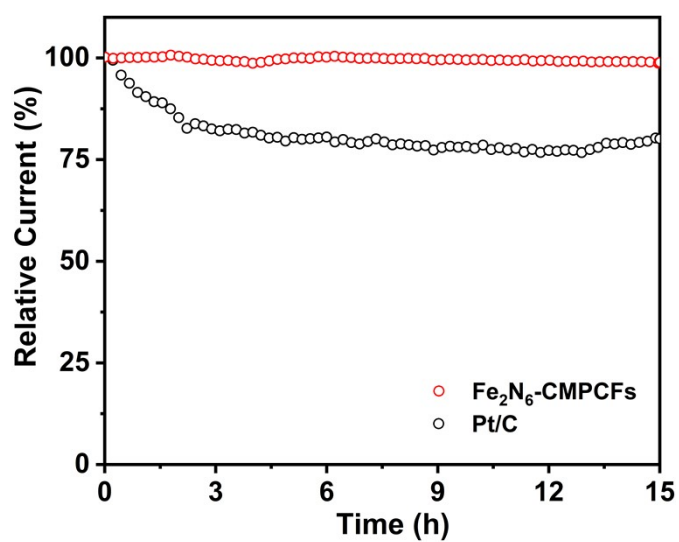

**Figure S31.** Chronoamperometry test ( $i$ - $t$ ) of  $\text{Fe}_2\text{N}_6\text{-CMPCFs}$  and Pt/C.

**Note:**  $i$ - $t$  measurement shows  $\text{Fe}_2\text{N}_6\text{-CMPCFs}$  can remain nearly 98% original current, outperforming commercial Pt/C (65%) at 0.8 V vs. RHE.

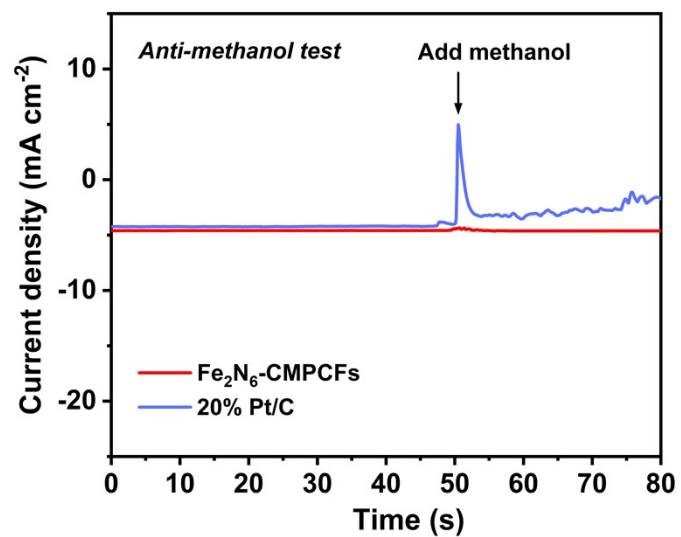

**Figure S32.** Methanol tolerance of Fe<sub>2</sub>N<sub>6</sub>-CMPCFs and Pt/C.

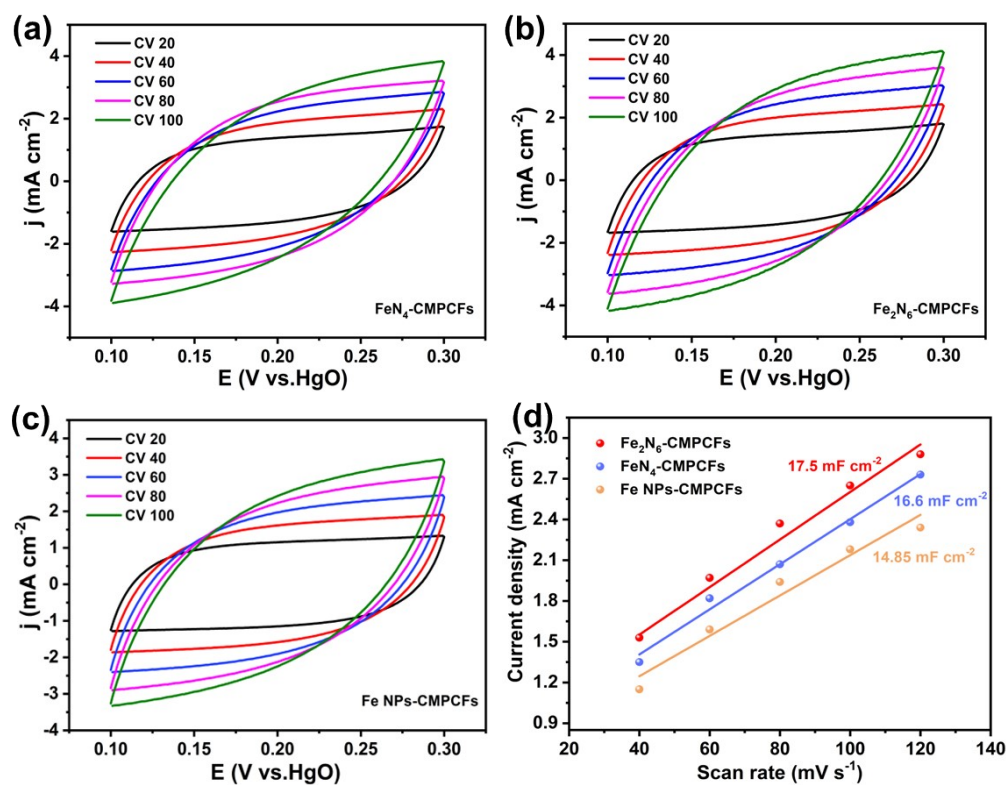

**Figure S33.** Cyclic voltammetry (CV) curves of a) FeN<sub>4</sub>-CMPCFs, b) Fe<sub>2</sub>N<sub>6</sub>-CMPCFs, and c) Fe NPs-CMPCFs catalyst at different scan rates ranging from 40 to 120 mV s<sup>-1</sup>. d) Capacitive currents versus scan rates of different samples.

**Note:** The double layer capacitance ( $C_{dl}$ ) value was estimated by the linear slope of the fitted line which was plotted by capacitive currents versus scan rates. Herein, the scan rate was used from 40 to 120 mV s<sup>-1</sup>.



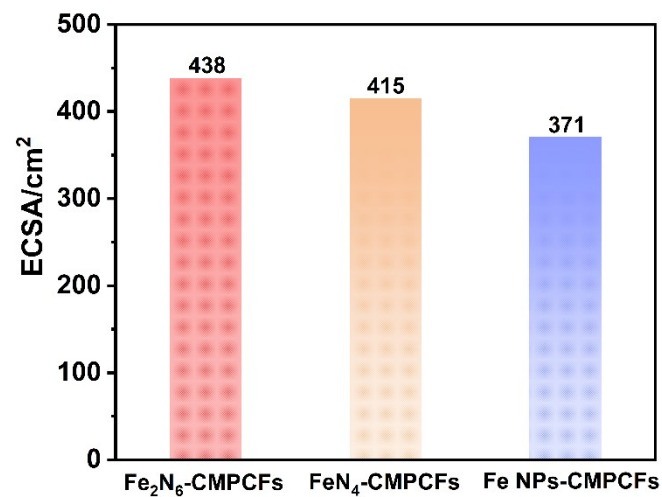

**Figure S34.** Bar chart of ECSA value for as-prepared catalysts.

**Note:** ECSA is determined through the following equation:

$$\text{ECSA} = \frac{Cdl}{Cs}$$

where the  $Cs$  value is adopted as  $\approx 0.04 \text{ mF cm}^{-2}$ .

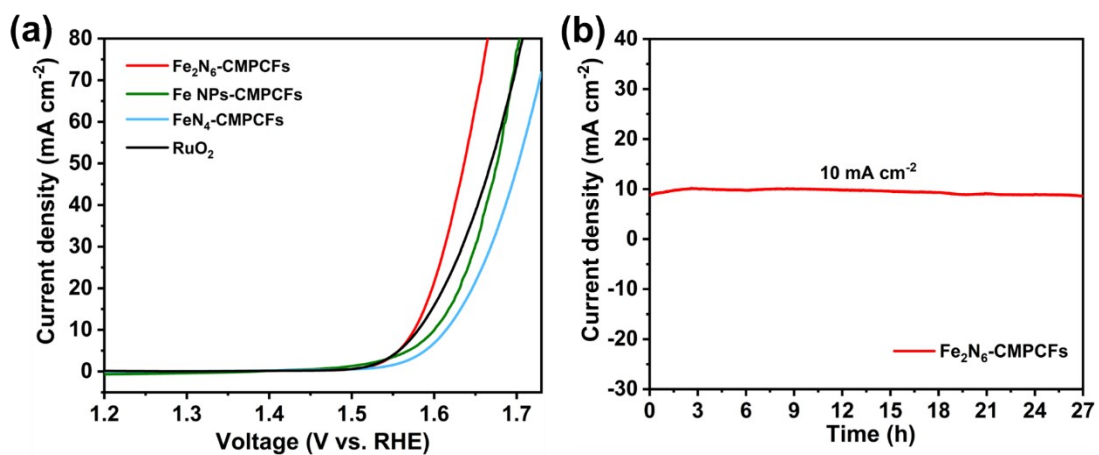

**Figure S35.** (a) LSV curves of Fe<sub>2</sub>N<sub>6</sub>-CMPCFs, FeN<sub>4</sub>-CMPCFs, Fe NPs-CMPCFs and RuO<sub>2</sub>; (b) The *i-t* test of Fe<sub>2</sub>N<sub>6</sub>-CMPCFs.

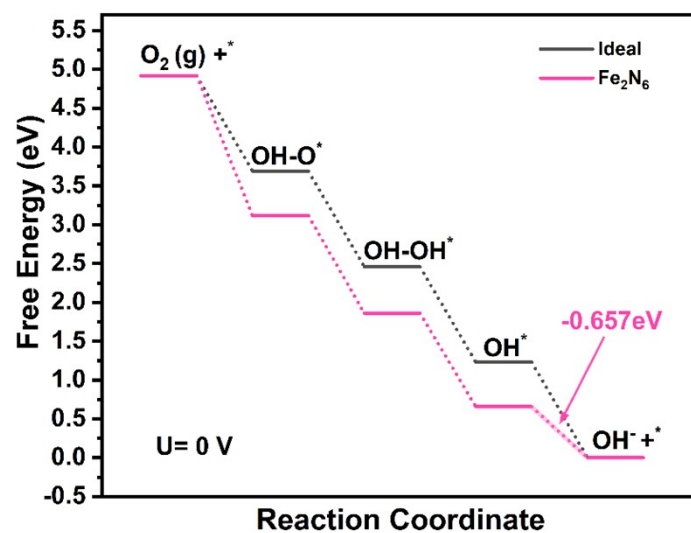

**Figure S36.** Free energy diagrams of the ORR on  $\text{Fe}_2\text{N}_6$  structure.

**Note:** From the last step, we can observe that the calculated free energy is relatively low, which is always negative at the working potential. Therefore,  $\text{Fe}_2\text{-N}_6$  sites trend to coordinate by an extra OH ligand ( $\text{Fe}_2\text{N}_6\text{OH}$ ) when they serve as ORR active sites.

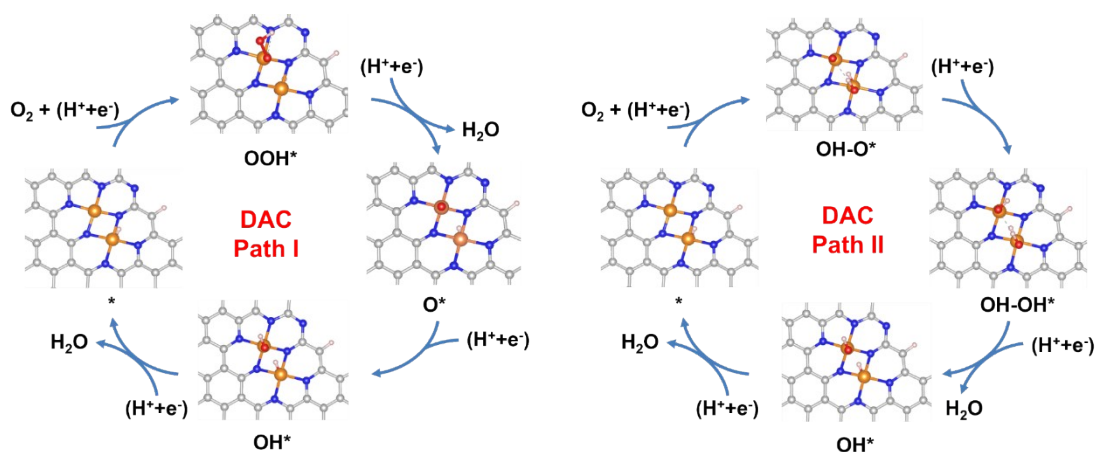

**Figure S37.** Reaction scheme of Fe<sub>2</sub>N<sub>6</sub>OH-Ch-N<sub>py</sub> sites in the traditional ORR pathway (Path I) and the two-site dissociation pathway (Path II).

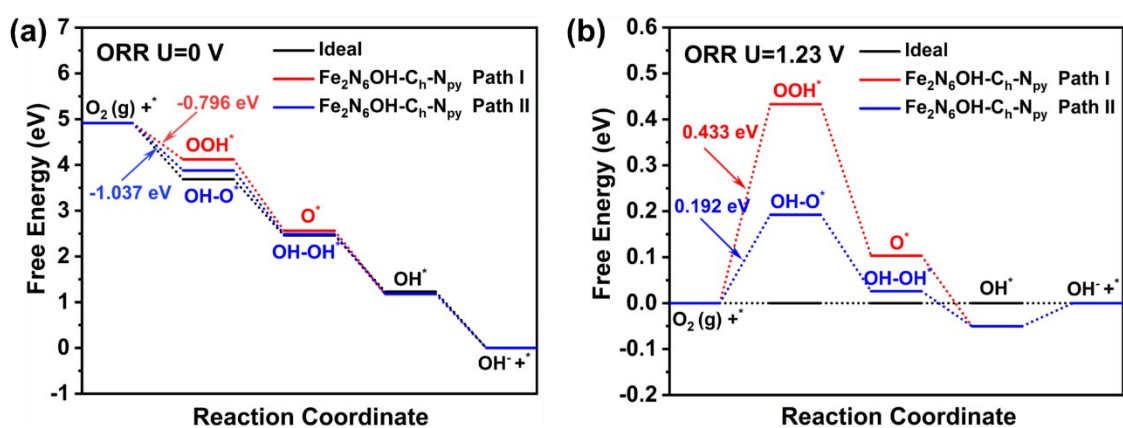

**Figure S38.** The Gibbs energy diagrams of Fe<sub>2</sub>N<sub>6</sub>OH-Ch-N<sub>py</sub> sites (a) U=0V and (b) U= 1.23V in the traditional pathway (Path I) and the two-site dissociation pathway (Path II).

**SAC:**

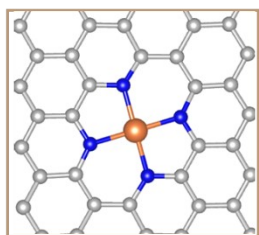

**FeN<sub>4</sub>**

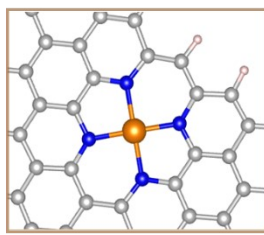

**FeN<sub>4</sub>-C<sub>h</sub>**

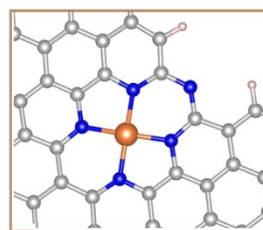

**FeN<sub>4</sub>-C<sub>h</sub>-N<sub>py</sub>**

**DAC:**

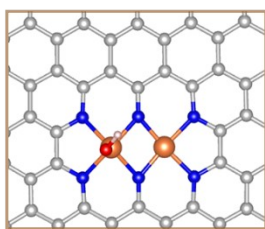

**Fe<sub>2</sub>N<sub>6</sub>OH**

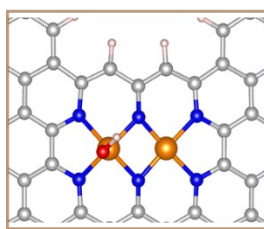

**Fe<sub>2</sub>N<sub>6</sub>OH-C<sub>h</sub>**

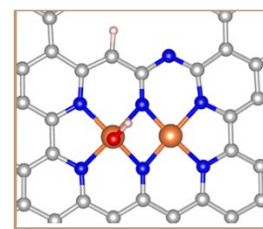

**Fe<sub>2</sub>N<sub>6</sub>OH-C<sub>h</sub>-N<sub>py</sub>**

**Figure S39.** Structure diagrams of different SAC and DAC catalysts (the balls in brown, yellow, white, red, and pink represent C, Fe, N, O, H, respectively.).

**Note:** Here, C<sub>h</sub> represents the existence of carbon holes around the active sites, and N<sub>py</sub> represents the existence of pyridinic-N around the active sites.

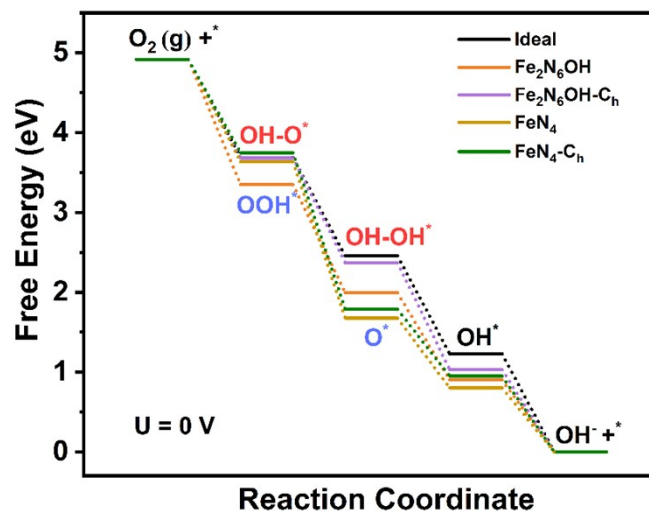

**Figure S40.** Free energy diagrams of the ORR on  $\text{FeN}_4$ ,  $\text{FeN}_4\text{-C}_h$ ,  $\text{Fe}_2\text{N}_6\text{OH}$ , and  $\text{Fe}_2\text{N}_6\text{OH-C}_h$ .

**Note:** We discover that the  $\text{Fe}_2\text{N}_6$  system ( $\text{Fe}_2\text{N}_6\text{OH}$ , and  $\text{Fe}_2\text{N}_6\text{OH-C}_h$ ) is closer to the ideal's free energy pathways of ORR at  $U=0$  V, which reveals that the synergistic interaction between Fe-Fe in DAC system can facilitate the ORR catalytic reaction.

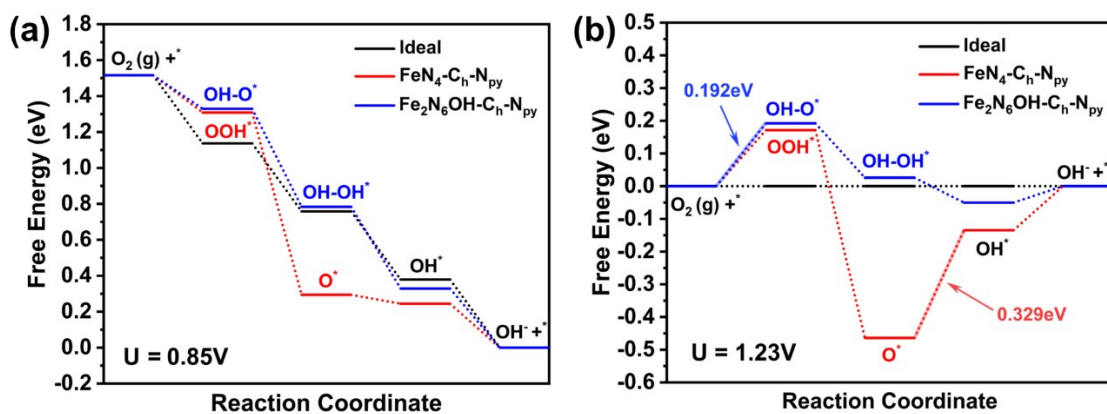

**Figure S41.** Free energy diagrams of the ORR on  $\text{Fe}_2\text{N}_6\text{OH-C}_6\text{H-N}_{\text{py}}$  at (a)  $U=1.23\text{V}$  and (b)  $U=0.85\text{V}$ .

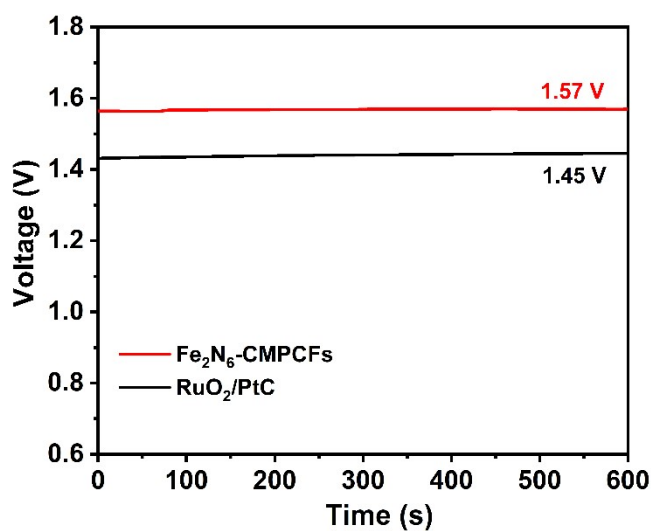

**Figure S42.** Open-circuit voltage of ZABs using  $\text{Fe}_2\text{N}_6\text{-CMPCFs}$  and  $\text{RuO}_2/\text{PtC}$ .

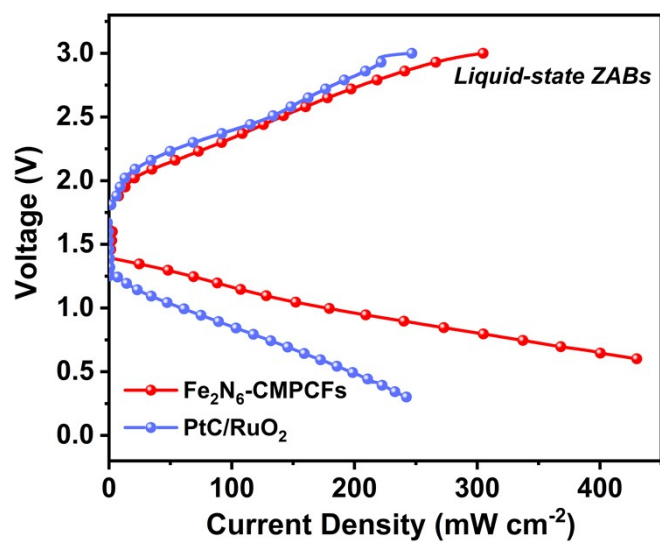

**Figure S43.** Charge/discharge polarization profiles of liquid-state ZABs by using  $\text{Fe}_2\text{N}_6\text{-CMPCFs}$  and  $\text{PtC/RuO}_2$  as cathodes.

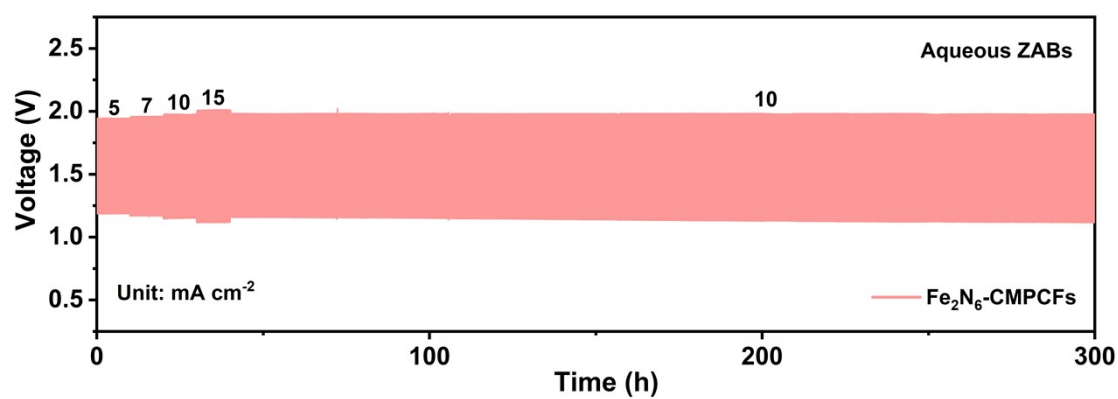

**Figure S44.** The rate capacity of liquid-state ZABs by using  $\text{Fe}_2\text{N}_6\text{-CMPCFs}$  at large current densities.



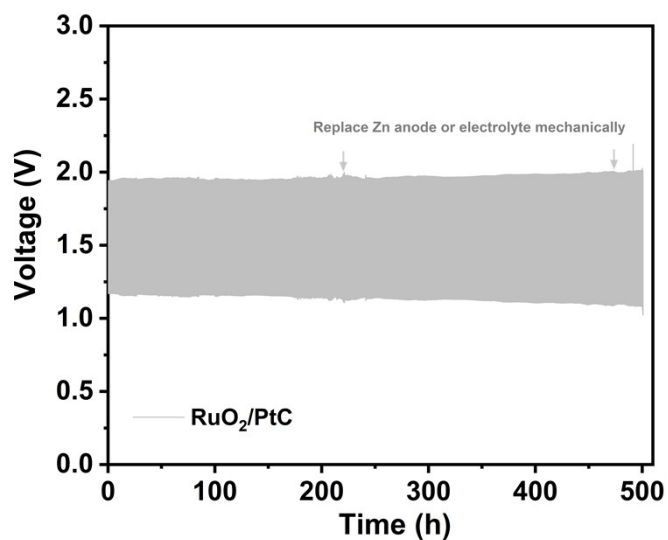

**Figure S45.** Galvanostatic discharge-charge test of  $\text{RuO}_2/\text{PtC}$  at  $5 \text{ mA cm}^{-2}$ .

**Note:** It is obvious that despite replacing the Zn anode and electrolyte, the voltage gap is still continuously increasing for  $\text{RuO}_2/\text{PtC}$ -based ZABs.

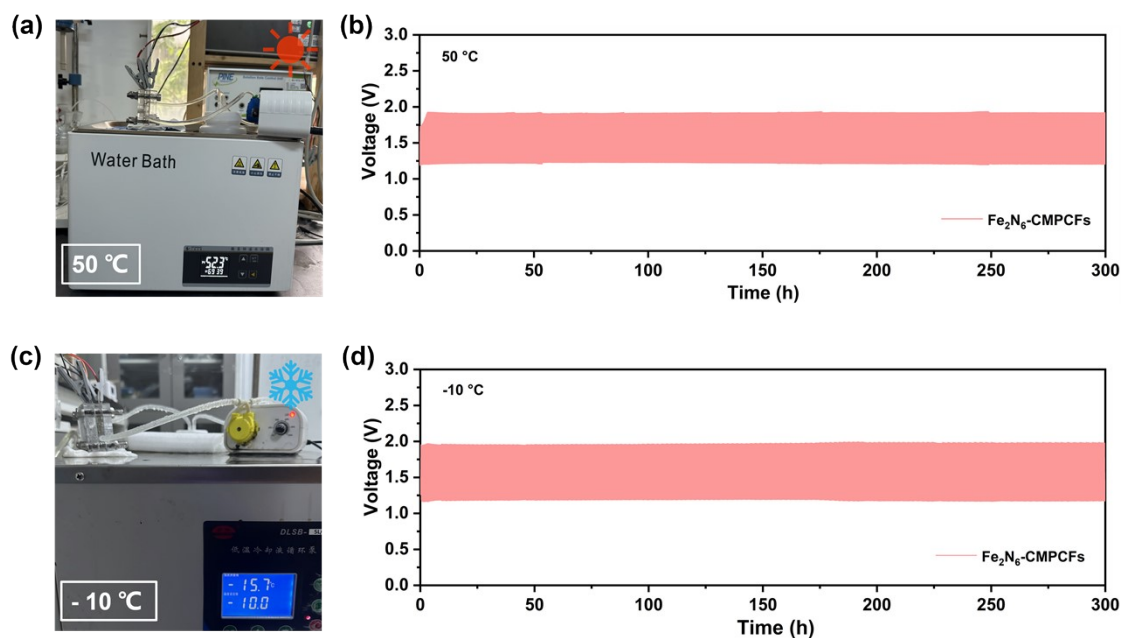

**Figure S46.** The stability tests of  $\text{Fe}_2\text{N}_6\text{-CMPCFs}$  membrane-based ZABs under (a) high temperature ( $50 \text{ }^\circ\text{C}$ ) and (b) low temperature ( $-10 \text{ }^\circ\text{C}$ ) conditions at  $5 \text{ mA cm}^{-2}$ .

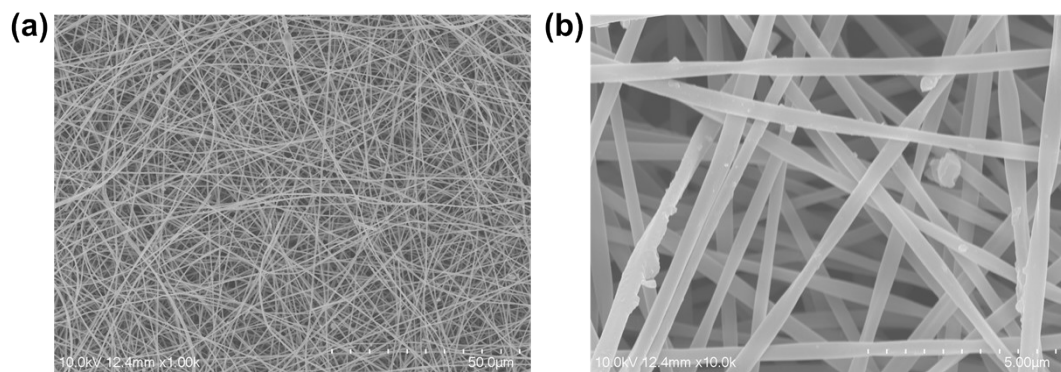

**Figure S47.** SEM images of  $\text{Fe}_2\text{N}_6$ -CMPCFs membrane after 4800-h battery operation.

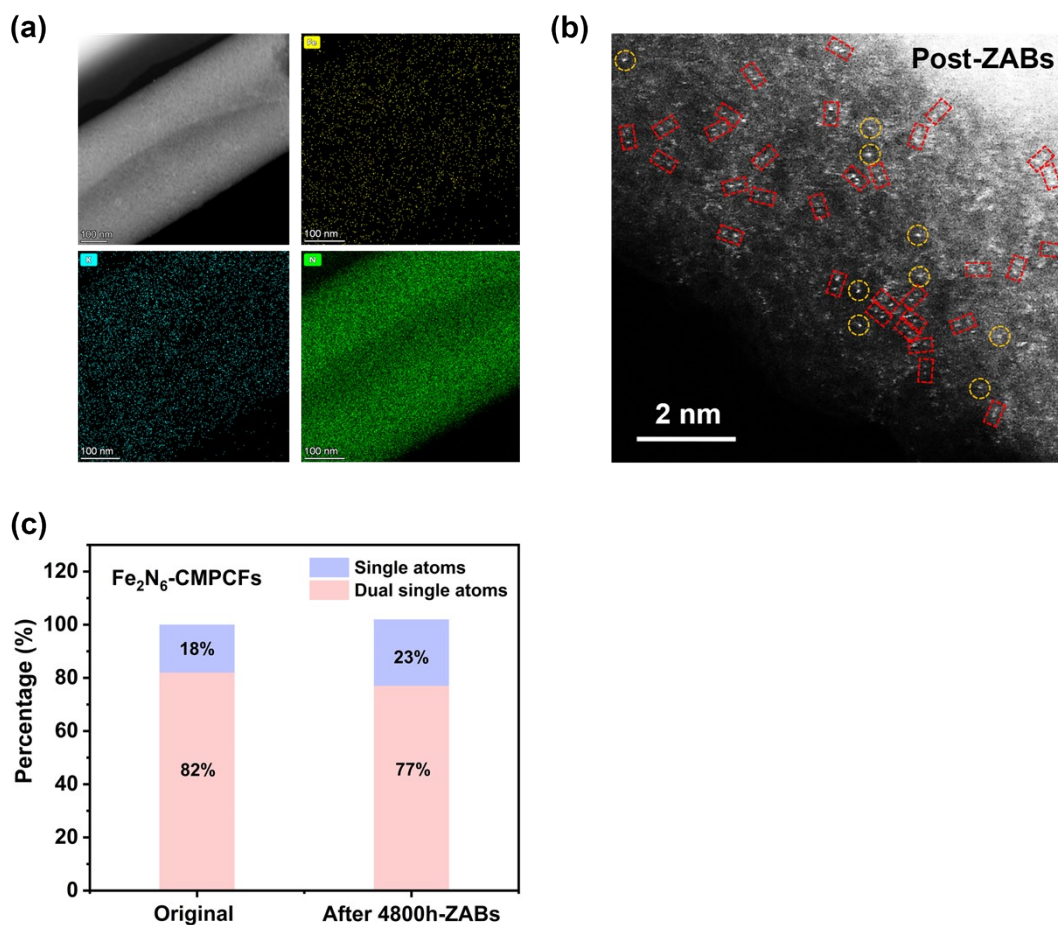

**Figure S48.** (a-b) AC-HAADF-STEM images of  $\text{Fe}_2\text{N}_6$ -CMPCFs after the discharge-charge cycling. (c) The statistical analysis of single-atomic and dual-atomic sites in  $\text{Fe}_2\text{N}_6$ -CMPCFs before and after the 4800-h cycling of ZABs.

**Note:** Based on HAADF-STEM images, the fibrous structure remains well-reserved without noticeable Fe aggregation. Notably, the high ratio of dual-single-atomic sites, up to approximately 77 %, can be detected after the 4800-h cycling, demonstrating its remarkable anti-dissolving effect.

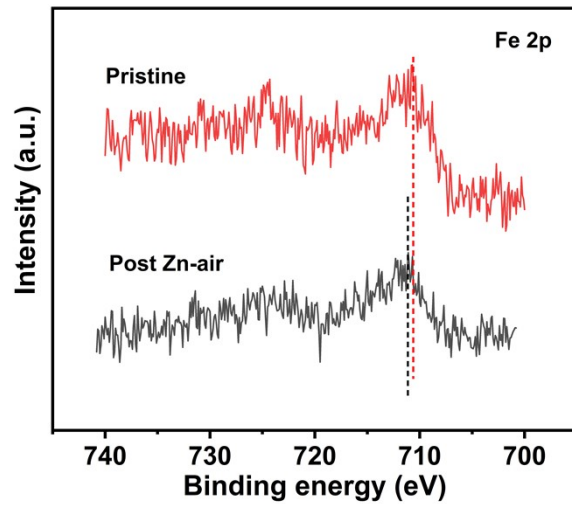

**Figure S49.** The Fe 2p XPS spectra of  $\text{Fe}_2\text{N}_6$ -CMPCFs before and after the cycling test.

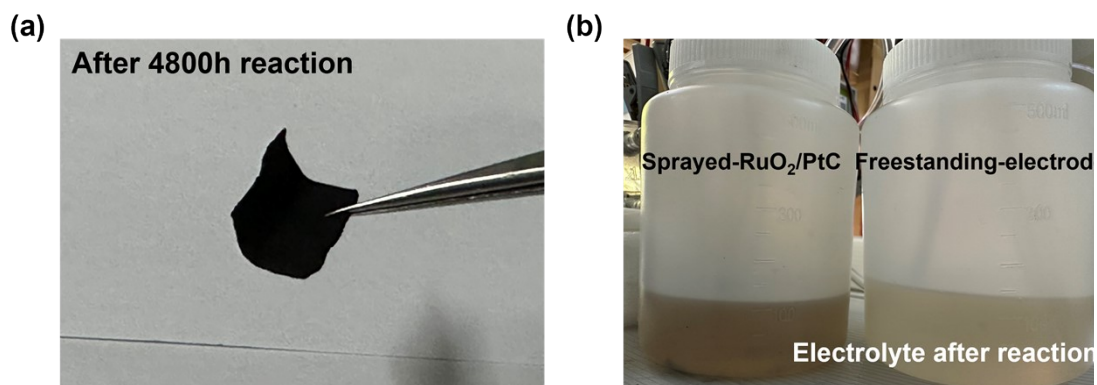

**Figure S50.** Digital photos of a) freestanding membrane and b) electrolyte after the cell operation.

**Note:** We can obviously see the color difference of electrolyte between sprayed-RuO<sub>2</sub>/PtC and freestanding Fe<sub>2</sub>N<sub>6</sub>-CMPCFs membrane after long-term Zn-air operation, which illustrates the sprayed catalysts trend to peel off from the substrate during the cell operation. By contrast, the self-supporting integrated Fe<sub>2</sub>N<sub>6</sub>-CMPCFs membrane preserves perfectly after the 4800-h cell operation.

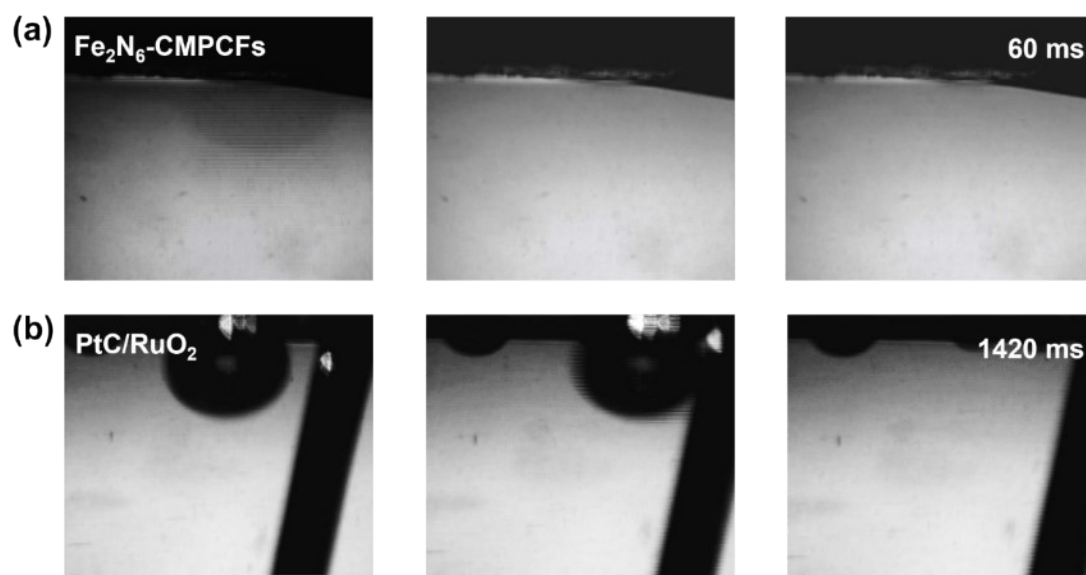

**Figure S51.**  $\text{O}_2$  bubbles adhesion behavior evolution on the surfaces of  $\text{PtC/RuO}_2$  and  $\text{Fe}_2\text{N}_6\text{-CMPCFs}$  membrane.

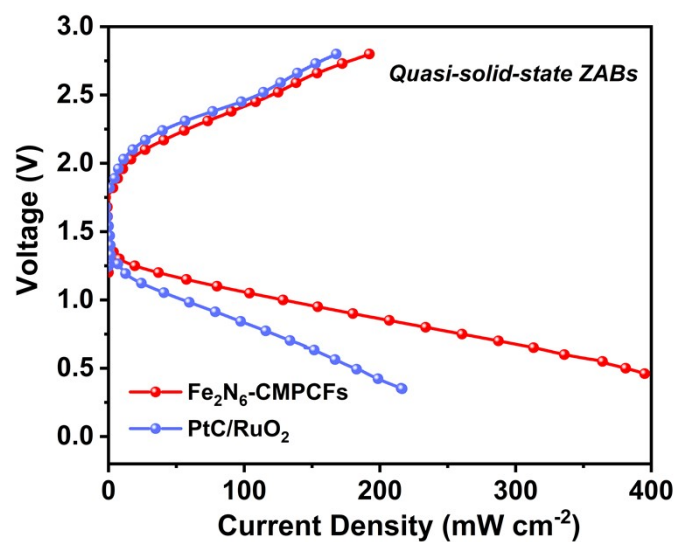

**Figure S52.** Charge/discharge polarization profiles of quasi-solid-state ZABs by using Fe<sub>2</sub>N<sub>6</sub>-CMPCFs and PtC/RuO<sub>2</sub> as cathodes.

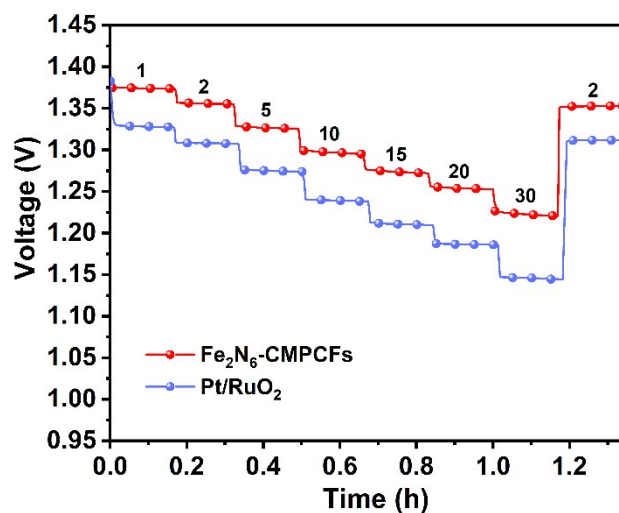

**Figure S53.** Rate performance of Fe<sub>2</sub>N<sub>6</sub>-CMPCFs and RuO<sub>2</sub>/PtC based quasi-solid-state Zn-air batteries.

**Note:** Fe<sub>2</sub>N<sub>6</sub>-CMPCFs based solid-state Zn-air battery performs a higher voltage platform (1.23 V) than that of RuO<sub>2</sub>/PtC (1.15 V) at the current density of 30 mA cm<sup>-2</sup>.



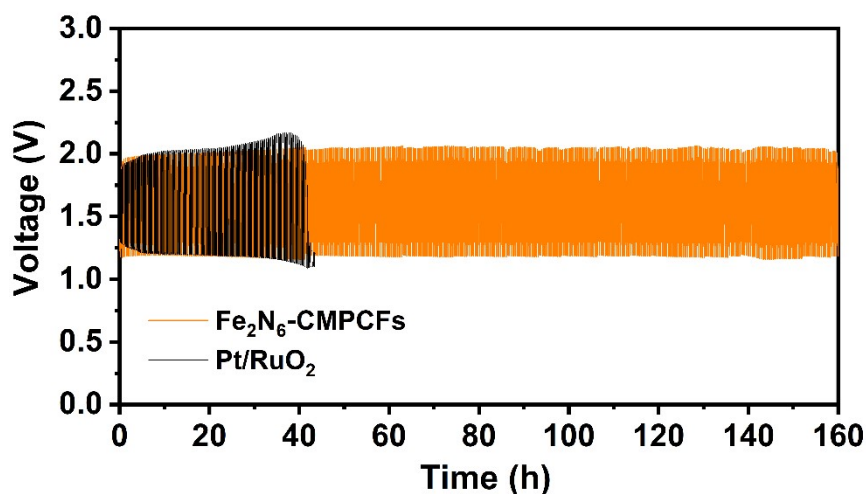

**Figure S54.** Galvanostatic discharging-charging test of flexible solid-state  $\text{Fe}_2\text{N}_6$ -CMPCFs-based ZABs.

**Note:** Without replacing the hydrogel,  $\text{Fe}_2\text{N}_6$ -CMPCFs based solid-state ZABs display better stability and long-cycling lifespan.

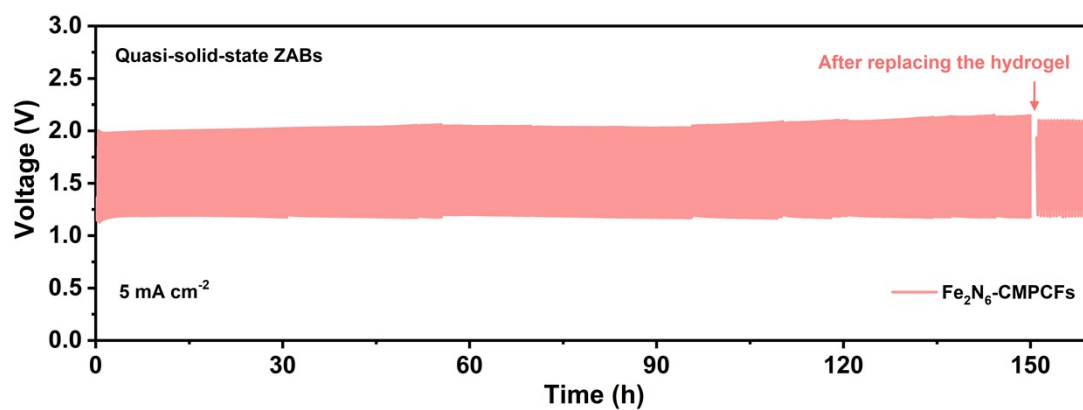

**Figure S55.** The stability test for quasi-solid-state ZABs by using  $\text{Fe}_2\text{N}_6$ -CMPCFs membranes at a higher current density of  $5 \text{ mA cm}^{-2}$ . The hydrogel is replaced after 150 h.

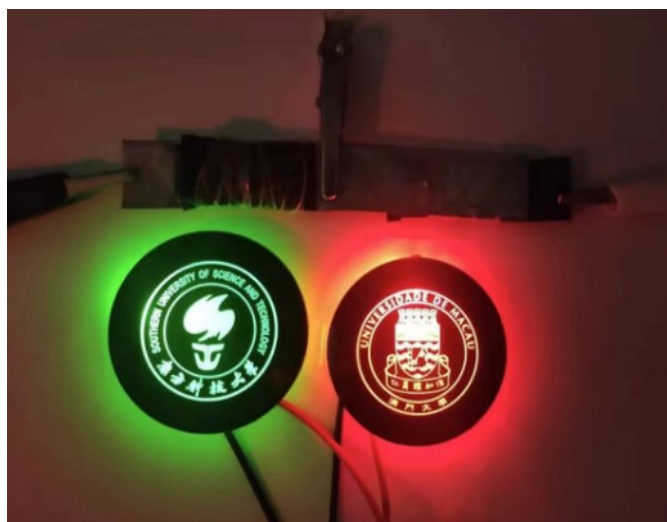

**Figure S56.** Optical photos of solid-state ZABs-driven LED screens.

### 3. Supplementary tables

**Table S1.** Dissolution Free energy of Fe atoms ( $\Delta G_{\text{disso}}$ ).

|                                                                 | $\Delta G_{\text{disso}}$ |
|-----------------------------------------------------------------|---------------------------|
| FeN <sub>4</sub>                                                | 0.94                      |
| FeN <sub>4</sub> -C <sub>h</sub>                                | 1.30                      |
| FeN <sub>4</sub> -C <sub>h</sub> -N <sub>py</sub>               | 1.32                      |
| Fe <sub>2</sub> N <sub>6</sub> -C <sub>h</sub> -N <sub>py</sub> | 1.41                      |

**Table S2.** Content of iron in different samples (tested by Inductively Coupled Plasma).

| Catalyst       | FeN <sub>4</sub> -CMPCFs | Fe <sub>2</sub> N <sub>6</sub> -CMPCFs | Fe NPs-CMPCFs |
|----------------|--------------------------|----------------------------------------|---------------|
| Content (wt.%) | 1.5                      | 2.6                                    | 3.9           |

**Table S3.** The content of elements obtained from XPS analysis.

|                                        | C (wt.%) | N (wt.%) | O (wt.%) | Fe (wt.%) |
|----------------------------------------|----------|----------|----------|-----------|
| FeN <sub>4</sub> -CMPCFs               | 84.1     | 4.9      | 10.0     | 1.2       |
| Fe <sub>2</sub> N <sub>6</sub> -CMPCFs | 81.8     | 5.4      | 10.4     | 2.4       |
| Fe NPs-CMPCFs                          | 80.6     | 3.9      | 11.2     | 4.4       |

**Table S4.** Fitting parameters for Fe K-edge EXAFS for related samples.

|                                        | Shell        | CN      | R(Å)             | $\sigma^2$ | $\Delta E_0$ | R factor |
|----------------------------------------|--------------|---------|------------------|------------|--------------|----------|
| Fe foil                                | Fe-Fe        | 8       | 2.47±0.01        | 0.0047     | 7.0±0.8      | 0.0036   |
|                                        | Fe-Fe        | 6       | 2.86±0.01        | 0.0060     |              |          |
| FeN <sub>4</sub> -CMPCFs               | Fe-N         | 4.0±0.2 | 1.98±0.01        | 0.0084     | -4.4±1.3     | 0.0067   |
|                                        | <b>Fe-N1</b> | 2.1±0.2 | <b>1.89±0.01</b> | 0.0033     |              |          |
| Fe <sub>2</sub> N <sub>6</sub> -CMPCFs | <b>Fe-N2</b> | 1.9±0.4 | <b>2.01±0.01</b> | 0.0033     | -2.5±1.5     | 0.0053   |
|                                        | Fe-Fe        | 1.0±0.1 | 2.55±0.01        | 0.0121     |              |          |

<sup>a</sup>N: coordination numbers; <sup>b</sup>R: bond distance; <sup>c</sup> $\sigma^2$ : Debye-Waller factors; <sup>d</sup>  $\Delta E_0$ : the inner potential correction. R factor: goodness of fit.

**Note:** The obtained XAFS data was processed in Athena (version 0.9.26) for background, pre-edge line and post-edge line calibrations. Then Fourier transformed fitting was carried out in Artemis (version 0.9.26). The  $k^3$  weighting, k-range of 3~13 Å<sup>-1</sup> and R range of 1~3 Å were used for the fitting of Fe foil; k-range of 3~12 Å<sup>-1</sup> and R range of 1~2.5 Å were used for the fitting of FeN<sub>4</sub>-CMPCFs, Fe<sub>2</sub>N<sub>6</sub>-CMPCFs. The four parameters, coordination number, bond length, Debye-Waller factor and E<sub>0</sub> shift (CN, R,  $\Delta E_0$ ) were fitted without anyone was fixed, the  $\sigma^2$  was set.

**Table S5.** The adsorption free energy (eV)  $\Delta G_{\text{OOH}^*}$  (or  $\Delta G_{\text{OH-O}^*}$ ),  $\Delta G_{\text{O}^*}$  (or  $\Delta G_{\text{OH-OH}^*}$ ) and  $\Delta G_{\text{OH}^*}$  of each model

|                                                                   | $\Delta G_{\text{OOH}^*}$ or $\Delta G_{\text{OH-O}^*}$ | $\Delta G_{\text{O}^*}$ or $\Delta G_{\text{OH-OH}^*}$ | $\Delta G_{\text{OH}^*}$ |
|-------------------------------------------------------------------|---------------------------------------------------------|--------------------------------------------------------|--------------------------|
| FeN <sub>4</sub>                                                  | 3.634                                                   | 1.675                                                  | 0.801                    |
| FeN <sub>4</sub> -C <sub>h</sub>                                  | 3.749                                                   | 1.785                                                  | 0.948                    |
| FeN <sub>4</sub> -C <sub>h</sub> -N <sub>py</sub>                 | 3.858                                                   | 1.994                                                  | 1.094                    |
| Fe <sub>2</sub> N <sub>6</sub> OH                                 | 3.348                                                   | 1.993                                                  | 0.902                    |
| Fe <sub>2</sub> N <sub>6</sub> OH-C <sub>h</sub>                  | 3.681                                                   | 2.370                                                  | 1.031                    |
| Fe <sub>2</sub> N <sub>6</sub> OH-C <sub>h</sub> -N <sub>py</sub> | 3.929                                                   | 2.476                                                  | 1.177                    |

**Table S6.** The reaction free energy (eV vs RHE) of elementary step for ORR ( $\Delta G_1$ ,  $\Delta G_2$ ,  $\Delta G_3$ ,  $\Delta G_4$ ) at  $U_{\text{RHE}}=0\text{V}$  and potential determining step for ORR (red)

|                                                                   | $\Delta G_1$  | $\Delta G_2$ | $\Delta G_3$  | $\Delta G_4$  |
|-------------------------------------------------------------------|---------------|--------------|---------------|---------------|
| FeN <sub>4</sub>                                                  | -1.282        | -1.958       | -0.875        | <b>-0.801</b> |
| FeN <sub>4</sub> -C <sub>h</sub>                                  | -1.167        | -1.964       | <b>-0.837</b> | -0.948        |
| FeN <sub>4</sub> -C <sub>h</sub> -N <sub>py</sub>                 | -1.058        | -1.864       | <b>-0.900</b> | -1.094        |
| Fe <sub>2</sub> N <sub>6</sub> OH                                 | -1.568        | -1.355       | -1.090        | <b>-0.902</b> |
| Fe <sub>2</sub> N <sub>6</sub> OH-C <sub>h</sub>                  | -1.235        | -1.311       | -1.339        | <b>-1.031</b> |
| Fe <sub>2</sub> N <sub>6</sub> OH-C <sub>h</sub> -N <sub>py</sub> | <b>-1.037</b> | -1.395       | -1.305        | -1.179        |

**Table S7.** Theoretical overpotential for ORR ( $U^{\text{over}}$ , V vs RHE) of each model.

|                                                                   | $U^{\text{over}}_{\text{ORR}}$ |
|-------------------------------------------------------------------|--------------------------------|
| FeN <sub>4</sub>                                                  | 0.428                          |
| FeN <sub>4</sub> -C <sub>h</sub>                                  | 0.392                          |
| FeN <sub>4</sub> -C <sub>h</sub> -N <sub>py</sub>                 | 0.329                          |
| Fe <sub>2</sub> N <sub>6</sub> OH                                 | 0.327                          |
| Fe <sub>2</sub> N <sub>6</sub> OH-C <sub>h</sub>                  | 0.198                          |
| Fe <sub>2</sub> N <sub>6</sub> OH-C <sub>h</sub> -N <sub>py</sub> | 0.192                          |

**Table S8.** The d-band centers (eV vs. Fermi Energy) of Fe atoms in various models

|                                                                   | Spin-up       | Spin-down    | Type           |
|-------------------------------------------------------------------|---------------|--------------|----------------|
| FeN <sub>4</sub>                                                  | -2.393        | 0.616        | Fe(II)         |
| FeN <sub>4</sub> -C <sub>h</sub>                                  | -2.300        | 0.692        | Fe(II)         |
| FeN <sub>4</sub> -C <sub>h</sub> -N <sub>py</sub>                 | <b>-2.199</b> | <b>0.791</b> | Fe(II)         |
| Fe <sub>2</sub> N <sub>6</sub> OH-C <sub>h</sub> -N <sub>py</sub> | -3.768        | 0.100        | Fe(II)&Fe(III) |
| Fe <sub>2</sub> N <sub>6</sub> OH-C <sub>h</sub> -N <sub>py</sub> | <b>-3.643</b> | <b>0.018</b> | Fe(II)         |
| Fe <sub>2</sub> N <sub>6</sub> OH-C <sub>h</sub> -N <sub>py</sub> | -3.894        | 0.182        | Fe(III)        |

**Table S9.** The –ICOHP (eV) of Fe-N bonds in various models.

|                                                                   | <b>Fe-N1</b> | <b>Fe-N2</b> | <b>Fe-N3</b> | <b>Fe-N4</b> | <b>Total Fe-N</b> |
|-------------------------------------------------------------------|--------------|--------------|--------------|--------------|-------------------|
| <b>FeN<sub>4</sub></b>                                            | 2.299        | 2.340        | 2.301        | 2.341        | <b>9.280</b>      |
| <b>FeN<sub>4</sub>-C<sub>h</sub></b>                              | 2.345        | 2.432        | 2.360        | 2.457        | <b>9.594</b>      |
| <b>FeN<sub>4</sub>-C<sub>h</sub>-N<sub>py</sub></b>               | 2.357        | 2.392        | 2.379        | 2.439        | <b>9.567</b>      |
| <b>Fe<sub>2</sub>N<sub>6</sub>OH-C<sub>h</sub>-N<sub>py</sub></b> | 2.211        | 2.305        | 3.073        | 3.157        | <b>10.747</b>     |

**Table S10.** Contributions of various orbitals of Fe to the –ICOHP (eV) of Fe(orbital)-N in various models.

|                                                                   | <b>4s</b> | <b>3dx<sup>2</sup>-y<sup>2</sup></b> | <b>3dz<sup>2</sup></b> | <b>3dxy</b> | <b>3dxz</b> | <b>3dyz</b> |
|-------------------------------------------------------------------|-----------|--------------------------------------|------------------------|-------------|-------------|-------------|
| <b>FeN<sub>4</sub></b>                                            | 3.670     | 3.000                                | 0.618                  | 1.129       | 0.410       | 0.453       |
| <b>FeN<sub>4</sub>-C<sub>h</sub></b>                              | 3.642     | 3.110                                | 0.650                  | 1.223       | 0.455       | 0.516       |
| <b>FeN<sub>4</sub>-C<sub>h</sub>-N<sub>py</sub></b>               | 3.650     | 3.121                                | 0.643                  | 1.207       | 0.439       | 0.508       |
| <b>Fe<sub>2</sub>N<sub>6</sub>OH-C<sub>h</sub>-N<sub>py</sub></b> | 3.925     | 3.382                                | 0.740                  | 1.638       | 0.606       | 0.455       |

**Note:** The 4s, 3dx<sup>2</sup>-y<sup>2</sup>, 3dz<sup>2</sup> and 3dxy orbital interaction are regarded as  $\sigma$  interaction of Fe-N.

**Table S11.** Contributions of typical orbital interactions in Fe-Fe bond in Fe<sub>2</sub>N<sub>6</sub>OH-C<sub>h</sub>-N<sub>py</sub> system to the -ICOHP (eV).

| Fe <sub>2</sub> N <sub>6</sub> OH-C <sub>h</sub> -N <sub>py</sub>   |              |
|---------------------------------------------------------------------|--------------|
| 4s - 4s                                                             | <b>0.197</b> |
| 3dx <sup>2</sup> -y <sup>2</sup> - 3dx <sup>2</sup> -y <sup>2</sup> | 0.005        |
| 3dz <sup>2</sup> - 3dz <sup>2</sup>                                 | 0.000        |
| 3dxy - 3dxy                                                         | <b>0.092</b> |
| 3dxz - 3dxz                                                         | -0.002       |
| 3dyz - 3dyz                                                         | 0.006        |

**Table S12.** The partial charges of Fe(II) and coordinated N atoms in various models.

|                                                                   | N1           | N2           | N3           | N4           | Fe          | Type     |
|-------------------------------------------------------------------|--------------|--------------|--------------|--------------|-------------|----------|
| FeN <sub>4</sub>                                                  | -0.65        | -0.65        | -0.65        | -0.65        | 1.30        | Mulliken |
| FeN <sub>4</sub> -C <sub>h</sub>                                  | -0.64        | -0.65        | -0.63        | -0.63        | 1.31        | Mulliken |
| FeN <sub>4</sub> -C <sub>h</sub> -N <sub>py</sub>                 | <b>-0.63</b> | <b>-0.65</b> | <b>-0.62</b> | <b>-0.62</b> | <b>1.31</b> | Mulliken |
| Fe <sub>2</sub> N <sub>6</sub> OH-C <sub>h</sub> -N <sub>py</sub> | <b>-0.61</b> | <b>-0.64</b> | <b>-0.83</b> | <b>-0.86</b> | <b>1.45</b> | Mulliken |
| FeN <sub>4</sub>                                                  | -0.44        | -0.44        | -0.44        | -0.44        | 1.06        | Loewdin  |
| FeN <sub>4</sub> -C <sub>h</sub>                                  | -0.44        | -0.45        | -0.41        | -0.43        | 1.07        | Loewdin  |
| FeN <sub>4</sub> -C <sub>h</sub> -N <sub>py</sub>                 | <b>-0.44</b> | <b>-0.44</b> | <b>-0.41</b> | <b>-0.42</b> | <b>1.07</b> | Loewdin  |
| Fe <sub>2</sub> N <sub>6</sub> OH-C <sub>h</sub> -N <sub>py</sub> | <b>-0.43</b> | <b>-0.44</b> | <b>-0.66</b> | <b>-0.70</b> | <b>1.23</b> | Loewdin  |



**Table S13.** Comparison of liquid-state ZABs.

| Catalyst                                          | Open circuit voltage [V] | Peak power density [mW cm <sup>-2</sup> ] | Cycling current density [mA cm <sup>-2</sup> ] | Cycling stability              | Ref.                                                                                                                            |
|---------------------------------------------------|--------------------------|-------------------------------------------|------------------------------------------------|--------------------------------|---------------------------------------------------------------------------------------------------------------------------------|
| <b>This work</b>                                  | <b>1.57</b>              | <b>261.4</b>                              | <b>5</b>                                       | <b>14, 500 cycles (4800 h)</b> |                                                                                                                                 |
| PdMo bimetallic/C                                 | 1.48                     | 154.2                                     | 10                                             | 350 cycles (500 h)             | <i>Nature</i> <b>2019</b> , 574, 81.                                                                                            |
| Ni-NHGF                                           | /                        | 158                                       | 2                                              | 90 cycles (30 h)               | <i>Nat. Catal.</i> <b>2018</b> , 1, 63                                                                                          |
| HESA                                              | 1.48                     | 207                                       | 2                                              | 50 cycles (200 h)              | <i>Nat. Sustain.</i> <b>2023</b> , 6, 816–826                                                                                   |
| CoNC SAC                                          | /                        | 161.8                                     | 5                                              | 480 cycles (80 h)              | <i>Sci. Adv.</i> 8, eabn5091( <b>2022</b> )                                                                                     |
| Co SA-NDGs                                        | 1.53                     | 251.4                                     | 5                                              | 350 cycles (350 h)             | <i>Nat. Commun.</i> 13, 3689 ( <b>2022</b> )                                                                                    |
| Fe,Mn/N-C catalyst                                | 1.4                      | 160.8                                     | 5                                              | 735 cycles (81 h)              | <i>Nat. Commun.</i> 12, 1734 ( <b>2021</b> )                                                                                    |
| (Co,Fe) <sub>3</sub> N-2D                         | /                        | 234                                       | 5                                              | 38 cycles (750 h)              | <i>Nat. Commun.</i> <b>2020</b> , 11, 1952                                                                                      |
| hybrid ZAB                                        | 1.50                     | /                                         | 0.5                                            | 2600 h                         | <i>Joule</i> 6 ( <b>2022</b> ), 1617-1631                                                                                       |
| Fe <sub>H</sub> -N-C                              | 1.53                     | 225                                       | 5                                              | 1800 cycles (1200 h)           | <i>Adv. Mater.</i> <b>2023</b> , 35, 2210714                                                                                    |
| Alk-MXene/FePc                                    | 1.49                     | 191.5                                     | /                                              | /                              | <i>Adv. Mater.</i> <b>2023</b> , 35, 2210757                                                                                    |
| Fe/SNCFs-NH <sub>3</sub>                          | 1.38                     | 255.84                                    | 1                                              | 1000 cycles (1000 h)           | <i>Adv. Mater.</i> <b>2022</b> , 34, 2105410                                                                                    |
| Fe/Meso-NC-1000                                   | 1.52                     | 109.6                                     | 5                                              | 40 h                           | <i>Adv. Mater.</i> <b>2022</b> , 34, 2107291                                                                                    |
| Fe <sub>0.5</sub> Co@HOMNCP                       | 1.62                     | 134                                       | 2                                              | 120 h                          | <i>Adv. Mater.</i> <b>2022</b> , 34, 2109605                                                                                    |
| P/Fe-N-C                                          | 1.48                     | 269                                       | 10                                             | 576 cycles (192 h)             | <i>J. Am. Chem. Soc.</i> <b>2023</b> , 145, 3647–3655                                                                           |
| Co <sub>2</sub> P/CoN <sub>4</sub> @NSC-500       | 1.45                     | 134.5                                     | 5                                              | 3485 cycles (1742 h)           | <i>Angew. Chem. Int. Ed.</i> <b>2023</b> , 62, e202216950                                                                       |
| hydrophobic-Co <sub>3</sub> O <sub>4</sub> NSs/CC | 1.42                     | 171                                       | 5                                              | 500 cycles (166 h)             | <i>Angew. Chem. Int. Ed.</i> <b>2022</b> , 61, e202202671                                                                       |
| Fe-N-GDY                                          | /                        | 249                                       | 2                                              | 900 cycles                     | <i>Angew. Chem. Int. Ed.</i> <b>2022</b> , 61, e202208238                                                                       |
| Fe-N,O/G                                          | 1.55                     | 164.7                                     | /                                              | /                              | <i>Energy Environ. Sci.</i> , <b>2023</b> , <a href="https://doi.org/10.1039/D3EE00747B">https://doi.org/10.1039/D3EE00747B</a> |

**Table S14.** Comparison of flexible solid-state ZABs.

| Catalyst                                                | Peak power density<br>[mW cm <sup>-2</sup> ] | Cycling current<br>density<br>[mA cm <sup>-2</sup> ] | Cycling<br>stability | Ref.                                                                |
|---------------------------------------------------------|----------------------------------------------|------------------------------------------------------|----------------------|---------------------------------------------------------------------|
| <b>This work</b>                                        | <b>203.7</b>                                 | <b>2</b>                                             | <b>160 h</b>         |                                                                     |
| Fe/SNCFs-NH <sub>3</sub>                                | /                                            | 1                                                    | 60 h                 | <i>Adv. Mater.</i> <b>2022</b> , 34, 2105410                        |
| MoS <sub>2</sub> /Fe-N-C                                | 78                                           | 5                                                    | 17 h                 | <i>Proc. Natl. Acad. Sci. U.S.A.</i> <b>2021</b> , 118, e2110036118 |
| CoS/Fe <sub>3</sub> S <sub>4</sub> @SNCP                | 117                                          | 10                                                   | 30 h                 | <i>Adv. Energy Mater.</i> <b>2023</b> , 13, 2204245                 |
| CoCNTs/PNAs                                             | /                                            | 2                                                    | 43 h                 | <i>Adv. Energy Mater.</i> <b>2023</b> , 13, 2202871                 |
| IE-NiCoFe/HPLIG                                         | 88                                           | 5                                                    | 84 h                 | <i>Adv. Energy Mater.</i> <b>2022</b> , 12, 2200906                 |
| MXene/Zn-LDH-array@PVA                                  | 92.3                                         | 3                                                    | 50 h                 | <i>Adv. Energy Mater.</i> <b>2022</b> , 12, 2201393                 |
| FeMn-DSAC                                               | 184                                          | 2                                                    | 80 h                 | <i>Angew. Chem. Int. Ed.</i> <b>2022</b> , 61, e202115219           |
| Fe,Co,N-C                                               | 158                                          | 2                                                    | 34 h                 | <i>ACS Nano</i> <b>2022</b> , 16, 7890–7903                         |
| Ni-SAs/HCNFs/Co-NAs                                     | 57.6                                         | 10                                                   | 82 h                 | <i>ACS Nano</i> <b>2022</b> , 16, 9, 15273–15285                    |
| Fe <sub>1</sub> /d-CN                                   | 78                                           | 1                                                    | 20 h                 | <i>Energy Environ. Sci.</i> <b>2021</b> , 14, 6455–6463             |
| Fe SA/NCZ                                               | 101                                          | 2                                                    | 44 h                 | <i>Adv. Funct. Mater.</i> <b>2023</b> , 33, 2213897                 |
| IW-Co <sub>3</sub> O <sub>4</sub> -RuO <sub>2</sub> -HS | 64.5                                         | /                                                    | 30 h                 | <i>Adv. Funct. Mater.</i> <b>2022</b> , 32, 2203206                 |

## 4. Reference

1. Q. Luo, K. Wang, Q. Zhang, W. Ding, R. Wang, L. Li, S. Peng, D. Ji and X. Qin, *Angewandte Chemie International Edition*, **n/a**, e202413369.
2. G. Kresse and J. Furthmüller, *Comput. Mater. Sci.*, 1996, **6**, 15-50.
3. G. Kresse and J. Furthmüller, *Phys. Rev. B*, 1996, **54**, 11169-11186.
4. J. P. Perdew, K. Burke and M. Ernzerhof, *Phys. Rev. Lett.*, 1996, **77**, 3865-3868.
5. G. Kresse and D. Joubert, *Phys. Rev. B*, 1999, **59**, 1758-1775.
6. K. Mathew, R. Sundararaman, K. Letchworth-Weaver, T. A. Arias and R. G. Hennig, *J. Chem. Phys.*, 2014, **140**.
7. V. I. Anisimov, J. Zaanen and O. K. Andersen, *Phys. Rev. B*, 1991, **44**, 943-954.
8. H. Xu, D. Cheng, D. Cao and X. C. Zeng, *Nat. Catal.*, 2018, **1**, 339-348.
9. J. K. Nørskov, J. Rossmeisl, A. Logadottir, L. Lindqvist, J. R. Kitchin, T. Bligaard and H. Jónsson, *J. Phys. Chem. B*, 2004, **108**, 17886-17892.
10. W. Zou, R. Lu, X. Liu, G. Xiao, X. Liao, Z. Wang and Y. Zhao, *J. Mater. Chem. A*, 2022, **10**, 9150-9160.
11. V. Wang, N. Xu, J.-C. Liu, G. Tang and W.-T. Geng, *Compu. Phys. Commun.*, 2021, **267**, 108033.
12. R. Dronskowski and P. E. Blöchl, *J. Phys. Chem. C*, 1993, **97**, 8617-8624.
13. V. L. Deringer, A. L. Tchougréeff and R. Dronskowski, *J. Phys. Chem. A*, 2011, **115**, 5461-5466.
14. S. Maintz, V. L. Deringer, A. L. Tchougréeff and R. Dronskowski, *J. Comput. Chem.*, 2013, **34**, 2557-2567.
15. R. Nelson, C. Ertural, J. George, V. L. Deringer, G. Hautier and R. Dronskowski, *J. Comput. Chem.*, 2020, **41**, 1931-1940.
